# Supplementary material for: Opportunities and barriers in paediatric pulse oximetry for pneumonia in low-resource clinical settings: a qualitative evaluation from Malawi and Bangladesh
Source: PubMed Central journal article supplement (PMC5829842; doi:10.1136/bmjopen-2017-019177), 2018-01-30
Supplement: bmjopen-2017-019177.draft_revisions.pdf [file bmjopen-2017-019177.draft_revisions.pdf]

# BMJ Open

BMJ Open is committed to open peer review. As part of this commitment we make the peer review history of every article we publish publicly available.

When an article is published we post the peer reviewers' comments and the authors' responses online. We also post the versions of the paper that were used during peer review. These are the versions that the peer review comments apply to.

The versions of the paper that follow are the versions that were submitted during the peer review process. They are not the versions of record or the final published versions. They should not be cited or distributed as the published version of this manuscript.

BMJ Open is an open access journal and the full, final, typeset and author-corrected version of record of the manuscript is available on our site with no access controls, subscription charges or pay-per-view fees (<http://bmjopen.bmj.com>).

If you have any questions on BMJ Open's open peer review process please email [info.bmjopen@bmj.com](mailto:info.bmjopen@bmj.com)

# BMJ Open

## Opportunities and barriers in paediatric pulse oximetry for pneumonia in low-resource clinical settings: a qualitative evaluation from Malawi and Bangladesh

|                                 |                                                                                                                                                                                                                                                                                                                                                                                                                                                                                                                                                                                                                                                                                                                                                                                                                                                                                                                                                                                                                                                                    |
|---------------------------------|--------------------------------------------------------------------------------------------------------------------------------------------------------------------------------------------------------------------------------------------------------------------------------------------------------------------------------------------------------------------------------------------------------------------------------------------------------------------------------------------------------------------------------------------------------------------------------------------------------------------------------------------------------------------------------------------------------------------------------------------------------------------------------------------------------------------------------------------------------------------------------------------------------------------------------------------------------------------------------------------------------------------------------------------------------------------|
| Journal:                        | <i>BMJ Open</i>                                                                                                                                                                                                                                                                                                                                                                                                                                                                                                                                                                                                                                                                                                                                                                                                                                                                                                                                                                                                                                                    |
| Manuscript ID                   | bmjopen-2017-019177                                                                                                                                                                                                                                                                                                                                                                                                                                                                                                                                                                                                                                                                                                                                                                                                                                                                                                                                                                                                                                                |
| Article Type:                   | Research                                                                                                                                                                                                                                                                                                                                                                                                                                                                                                                                                                                                                                                                                                                                                                                                                                                                                                                                                                                                                                                           |
| Date Submitted by the Author:   | 15-Aug-2017                                                                                                                                                                                                                                                                                                                                                                                                                                                                                                                                                                                                                                                                                                                                                                                                                                                                                                                                                                                                                                                        |
| Complete List of Authors:       | King, C.; University College London Institute for Global Health, Boyd, Nicholas; Great Ormond Street Hospital For Children NHS Trust, UCL Institute of Child Health<br>Walker, Isabeau; Great Ormond Street Hospital For Children NHS Trust, UCL Institute of Child Health<br>Zadutsa, Beatiwel; Parent and Child Health Initiative<br>Baqui, Abdullah; Johns Hopkins University Bloomberg School of Public Health, International Center for Maternal and Newborn Health<br>Ahmed, Salahuddin; Johns Hopkins University Bloomberg School of Public Health, International Center for Maternal and Newborn Health<br>Islam, Mazharul; Shahjalal University of Science and Technology, Department of Anthropology<br>Kainja, Esther; Parent and Child Health Initiative<br>Nambiar, Bejoy; Institute for Global Health<br>Wilson, Iain; Lifebox Foundation<br>McCollum, Eric ; Johns Hopkins School of Medicine, Eudowood Division of Paediatric Respiratory Diseases; Johns Hopkins University Bloomberg School of Public Health, Department of International Health |
| <b>Primary Subject Heading</b>: | Global health                                                                                                                                                                                                                                                                                                                                                                                                                                                                                                                                                                                                                                                                                                                                                                                                                                                                                                                                                                                                                                                      |
| Secondary Subject Heading:      | Paediatrics, Respiratory medicine, Qualitative research, Diagnostics                                                                                                                                                                                                                                                                                                                                                                                                                                                                                                                                                                                                                                                                                                                                                                                                                                                                                                                                                                                               |
| Keywords:                       | PAEDIATRICS, QUALITATIVE RESEARCH, Pneumonia, Pulse Oximetry                                                                                                                                                                                                                                                                                                                                                                                                                                                                                                                                                                                                                                                                                                                                                                                                                                                                                                                                                                                                       |
|                                 |                                                                                                                                                                                                                                                                                                                                                                                                                                                                                                                                                                                                                                                                                                                                                                                                                                                                                                                                                                                                                                                                    |

SCHOLARONE™  
Manuscripts

1  
2  
3 1 **Title:** Opportunities and barriers in paediatric pulse oximetry for pneumonia in low-resource clinical  
4 2 settings: a qualitative evaluation from Malawi and Bangladesh  
5  
6  
7 3

8  
9 4 **Authors:** Carina King<sup>1\*</sup>, Nicholas Boyd<sup>2</sup>, Isabeau Walker<sup>2</sup>, Beatiwel Zadutsa<sup>3</sup>, Abdullah H. Baqui<sup>4</sup>,  
10 5 Salahuddin Ahmed<sup>4</sup>, Mazharul Islam<sup>5</sup>, Esther Kainja<sup>3</sup>, Bejoy Nambiar<sup>1</sup>, Iain Wilson<sup>6</sup>, Eric D.  
11 6 McCollum<sup>7,8</sup>  
12  
13  
14  
15 7

16  
17  
18 8 **Affiliations:**

- 19  
20 9 1. Institute for Global Health, University College London, London, UK  
21 10 2. Great Ormond Street Hospital NHS Foundation Trust, UCL Institute of Child Health, London,  
22 11 UK  
23 12 3. Parent and Child Health Initiative, Lilongwe, Malawi  
24 13 4. International Center for Maternal and Newborn Health, Johns Hopkins Bloomberg School of  
25 14 Public Health, Baltimore, USA  
26 15 5. Department of Anthropology, Shahjalal University of Science and Technology, Sylhet,  
27 16 Bangladesh  
28 17 6. Lifebox Foundation, London, UK  
29 18 7. Eudowood Division of Pediatric Respiratory Diseases, Johns Hopkins School of Medicine,  
30 19 Baltimore, USA  
31 20 8. Department of International Health, Johns Hopkins Bloomberg School of Public Health,  
32 21 Baltimore, USA  
33  
34  
35  
36  
37  
38  
39  
40  
41  
42

43 23 **\*Corresponding author:**

44  
45  
46 24 Address: Institute for Global Health, 30 Guilford Street, London, WC1N 1EH; Email: [c.king@ucl.ac.uk](mailto:c.king@ucl.ac.uk);  
47 25 telephone: +44 (0) 2076797619  
48  
49  
50 26

51  
52 27 **Keywords:** Pulse oximeter, oxygen saturation, pneumonia, sub-Saharan Africa, South Asia, children  
53  
54  
55 28

56  
57 29 **Word Count:** 3,908  
58  
59  
60

1  
2  
3 30 **Abstract**  
4

5 31 *Objective:* To gain an understanding of what challenges pulse oximetry for paediatric pneumonia  
6 management poses, how it has changed service provision and what would improve this device for  
7 use across paediatric clinical settings in low-income countries.  
8  
9

10 34 *Design:* Focus group discussions (FGDs), with purposive sampling and thematic analysis using a  
11 framework approach.  
12  
13

14 36 *Setting:* Community, front line outpatient and hospital outpatient and inpatient settings in Malawi  
15 and Bangladesh, which provide paediatric pneumonia care.  
16  
17

18 38 *Participants:* Healthcare providers (HCPs) from Malawi and Bangladesh who had received training in  
19 pulse oximetry and had been using oximeters in routine paediatric care, including community  
20 healthcare workers, non-physician clinicians or medical assistants, and hospital-based nurses and  
21 doctors.  
22  
23  
24

25 42 *Results:* We conducted six FGDs, with 23 participants from Bangladesh and 26 from Malawi. We  
26 identified five emergent themes: trust; value; user-related experience; sustainability and design.  
27 HCPs discussed the confidence gained through using oximeters, resulting in improved trust from  
28 caregivers and valuing the device; although there were conflicts between the weight given to clinical  
29 judgement versus oximeter results. HCPs reported the ease of using oximeters, but identified  
30 movement and physically smaller children as measurement challenges. Challenges in sustainability  
31 related to battery durability and replacement parts, however many HCPs had used the same device  
32 longer than four years demonstrating robustness within these settings. Desirable features included  
33 back-up power banks and integrated respiratory rate and thermometer capability.  
34  
35  
36  
37  
38  
39  
40  
41

42 51 *Conclusions:* Pulse oximetry was generally deemed valuable by HCPs for use as a spot-check device  
43 in a range of paediatric low-income clinical settings. Areas highlighted as challenges by HCPs, and  
44 therefore opportunities for re-design, included battery charging and durability, probe fit and  
45 sensitivity in paediatric populations.  
46  
47  
48  
49  
50  
51  
52  
53  
54

1  
2  
3 55 **Strengths and Limitations**  
4

- 5 56 • This is the first study to report on end-user perceptions of opportunities, challenges and  
6 57 desirable design features of pulse oximeters used for paediatric pneumonia management in  
7 58 low-resource settings, including community and outpatient providers.  
8  
9  
10 59 • Pulse oximeters were valued by healthcare providers, but challenges were highlighted with  
11 60 use in smaller and moving children. Desirable features to improve pulse oximeters for low-  
12 61 resource paediatric settings included improved battery life, integrated respiratory rate and  
13 62 temperature, and quicker results.  
14  
15  
16  
17 63 • A key strength was the wide range of healthcare provider perspectives included, from  
18 64 community to referral hospital settings in South Asia and sub-Saharan Africa.  
19  
20 65 • The study was limited to participant's experience of using specific pulse oximeters and  
21 66 therefore may lack generalizability to other paediatric pulse oximeters not used in these  
22 67 settings.  
23  
24  
25 68

## 69 Introduction

70 Several interventions, such as Pneumococcal conjugate vaccine (PCV) and standardised guidelines  
71 for diagnosis and treatment, have led to reductions in pneumonia morbidity and mortality over the  
72 last twenty years <sup>1,2</sup>. However, in spite of these gains, pneumonia remains the leading cause of  
73 infectious mortality amongst children globally, with the vast majority of the burden falling in sub-  
74 Saharan Africa and south Asia <sup>3</sup>. To accelerate reductions in pneumonia mortality, further  
75 refinement of diagnosis and treatment pathways are needed, including correct referral and access to  
76 oxygen treatment <sup>4</sup>.

77 Pulse oximetry non-invasively measures peripheral arterial oxyhemoglobin saturation (SpO<sub>2</sub>).  
78 Hypoxemia (defined as an SpO<sub>2</sub> <90%) is included in the World Health Organization (WHO)  
79 guidelines as a pneumonia danger sign <sup>5</sup>, and is associated with increased mortality from  
80 pneumonia, as well as other illnesses like malaria <sup>6-8</sup>. Recent evidence from Malawi has also  
81 indicated that a SpO<sub>2</sub> 90-92% is predictive of mortality amongst children hospitalized with  
82 pneumonia <sup>8</sup>.

83 While some studies have attempted to predict hypoxemia in children with pneumonia using a  
84 combination of clinical signs, there has been mixed success <sup>9-11</sup>. Clinical signs alone fail to identify a  
85 proportion of hypoxemic children based on the current WHO guidelines, which results in a missed  
86 opportunity for referral and appropriate treatment <sup>12,13</sup>. In addition, the subjectivity of clinical signs  
87 can lead to variation in care – especially among community healthcare workers (CHWs), who often  
88 lack ongoing supervision.

89 Pulse oximeters have been successfully used in low-resource paediatric settings, but are yet to be  
90 widely adopted, particularly during outpatient care <sup>14,15</sup>. The Ethiopian Ministry of Health has  
91 demonstrated leadership in this area, setting up an initiative in 2016 to ensure oximetry and oxygen  
92 therapy are available nationally across the healthcare system <sup>16</sup>. However, Ethiopia is an exception,  
93 with implementation of oximetry in other developing countries continuing to be slow.  
94 Implementation barriers cited include cost, lack of appropriately designed, robust oximeters and  
95 universal paediatric probes and issues with training and supervision <sup>17</sup>.

96 In order to better understand current barriers to use of pulse oximetry by healthcare providers  
97 (HCPs) in a range of healthcare settings, and explore opportunities that this technology provides,  
98 input from end-users is needed <sup>18</sup>. With the ultimate goal of designing a universal paediatric probe  
99 for all levels of healthcare services in resource-poor settings, we aimed to gain an understanding of  
100 the challenges of pulse oximetry, how its use has changed service provision and how current devices

1  
2  
3 101 could be improved for these settings. This end-user perspective is currently limited in the literature  
4 102 and is essential to ensure investment in pulse oximetry is sustainable and effective.  
5  
6

7 103  
8

9 104 **Methods**

10 105 We conducted a qualitative study with HCPs from different levels of the healthcare system in Malawi  
11 106 (Mchinji district, central region) and Bangladesh (Sylhet district, northeast region) from May – July  
12 107 2016, as part of a wider programme of work aiming to design a universal paediatric oximeter probe.  
13  
14  
15

16 108 Setting:

17  
18  
19  
20 109 In Malawi there are three levels of government provided healthcare: CHWs (locally known as Health  
21 110 Surveillance Assistants), health centres and district hospitals. CHWs conduct weekly or bi-weekly  
22 111 village clinics and home visits providing basic integrated community case management (iCCM) for  
23 112 paediatric infections<sup>19 20</sup>. Health centres are outpatient facilities run by nurses, clinical officers or  
24 113 medical assistants, and District Hospitals have inpatient facilities with capacity for oxygen treatment.  
25  
26 114 In Bangladesh, the study was conducted at Projahnmo, a research consortium comprised of Johns  
27 115 Hopkins University and several local non-governmental organizations in partnership with the  
28 116 Bangladesh Ministry of Family Health and Welfare. Current Projahnmo activities are integrated  
29 117 within three government-operated sub-district hospitals, called Upazila Health Complexes (UHCs),  
30 118 and the referral government hospital in Sylhet city (Osmani Medical College), all of which are staffed  
31 119 by physicians and nurses. The UHCs operate outpatient clinics for children under five and provide  
32 120 basic inpatient paediatric care, including oxygen. The majority of government provided inpatient  
33 121 care is provided at Osmani Medical College. Female CHWs employed by Projahnmo conduct  
34 122 bimonthly household surveillance, with a subset of CHWs providing weekly surveillance as a part of a  
35 123 PCV effectiveness study. Projahnmo CHWs conduct basic clinical assessments and refer ill children  
36 124 for care at the UHCs; they do not administer medicines themselves.  
37  
38  
39  
40  
41  
42  
43  
44  
45

46 125 Currently pulse oximetry is not part of standard care in the community or health centre setting in  
47 126 either Malawi or Bangladesh. In Mchinji, pulse oximetry was successfully introduced into all three  
48 127 healthcare settings in 2012 as part of a PCV research project, using the Acare Technology AH-MX  
49 128 manufactured Lifebox® oximeter and universal adult clip probe<sup>12</sup>. Since 2015, a National Institutes of  
50 129 Health-funded study (K01TW009988) trained and supplied all Projahnmo clinical staff in Bangladesh,  
51 130 including CHWs, with pulse oximeters to screen children for hypoxemia, using the Masimo Rad5®  
52 131 oximeter and the LNCS® Y-I Multisite wrap probe (Figure 1).  
53  
54  
55  
56  
57  
58  
59  
60

1  
2  
3 132 Design:  
4

5 133 We conducted focus group discussions (FGDs). We planned three FGDs in each country, aiming to  
6  
7 134 recruit between 6 and 10 people for each FGD (up to 60 participants in total). The groups were  
8  
9 135 planned to be CHWs, health centre or UHC staff, and referral hospital staff separately. Conducting  
10  
11 136 separate FGDs for the different types of healthcare workers was to allow context-specific discussions  
12  
13 137 and encourage participants with varying training backgrounds to feel confident about raising  
14  
15 138 challenges relevant to their specific setting.

16 139 Sampling:  
17

18 140 HCPs were purposefully sampled from sites where pulse oximetry had been introduced, and the  
19  
20 141 participants had received some form of training or mentorship in oximetry. Participants were  
21  
22 142 identified by local researchers (BZ in Malawi and SA in Bangladesh) to be a representative sample of  
23  
24 143 HCPs from their setting (e.g. small and large health centres, inpatient wards and outpatient  
25  
26 144 departments in the hospital), and contacted directly by phone. All HCPs contacted participated.  
27  
28 145 Participants were reimbursed for their travel costs and provided with refreshments.

29 146 Procedure:  
30

31 147 FGDs were led by local researchers with experience in conducting qualitative research, with support  
32  
33 148 from a facilitator with knowledge of pulse oximeters. The FGDs were divided into two sections, the  
34  
35 149 first addressing the participants' personal experience with using pulse oximeters. The topic guide  
36  
37 150 included: positive and negative experiences, and possible improvements and challenges (Web  
38  
39 151 appendix 1). During the second part of the discussion, the participants were presented with different  
40  
41 152 probe designs and given an opportunity to use them for an hour. Following this, the discussion  
42  
43 153 addressed positive and negative aspects of the different designs to encourage critical thinking of  
44  
45 154 possible design solutions to the current limitations of a universal paediatric probe.

46 155 The FGDs were audio recorded and then transcribed. The participants were told to answer in English  
47  
48 156 or their native tongue (Chichewa, Bangla or Sylheti), depending on their preference and ease of  
49  
50 157 expressing concepts. Recordings were transcribed and translated where necessary. Translations for  
51  
52 158 Malawi were done by BZ and EK together until final transcripts were agreed, and by an independent  
53  
54 159 professional service for Bangladesh.

54 160 Analysis:  
55

56 161 We analysed the data thematically using a framework approach, as an appropriate method for a  
57  
58 162 multi-disciplinary team conducting health research<sup>21</sup>. This process involves five steps:  
59  
60



1  
2  
3 163 familiarisation, identifying a thematic framework, indexing, mapping and interpretation<sup>22</sup>. The  
4 164 transcripts and notes from the FGDs were printed and coded on paper, with the coding matrix  
5 165 created in Microsoft Excel. CK and KF independently familiarised themselves and indexed the data,  
6 166 and the emergent themes were discussed until a consensus was reached on the mapping and  
7 167 interpretation of the data. This interpretation was shared with the local researchers (BZ and EK in  
8 168 Malawi; EDM and MI in Bangladesh) for further discussion until all were in agreement.

9  
10  
11  
12  
13 169 Ethics:

14  
15  
16 170 Written informed consent was obtained from all FGD participants. This study was reviewed and  
17 171 approved by the University College London research ethics committee (8075/003), Johns Hopkins  
18 172 Medicine Institutional Review Board (IRB00047406), the Malawi National Health Sciences Research  
19 173 Committee (16/4/1570) and Bangladesh Medical Research Council (BMRC/NREC/2013-2016/1272).

20  
21  
22  
23 174

24  
25  
26 175 **Results**

27  
28 176 We conducted six FGDs, with 23 participants from Bangladesh and 26 from Malawi (Table 1). We  
29 177 identified five emergent themes: trust; value; user-related experience; sustainability and design.

30  
31  
32 178 Trust

33  
34 179 Trust emerged as a theme both in terms of how the HCPs interpret the oximetry results, and how  
35 180 caregivers interact with HCPs and the pulse oximeter. We found that all cadres of HCPs in both sites  
36 181 had an awareness of the fallibility of the oximetry readings, specifically relating to lower SpO<sub>2</sub> values.  
37 182 For SpO<sub>2</sub> levels which were deemed abnormal, <90% up to <95% according to different participants,  
38 183 HCPs stated that they would often re-check the result before making a referral or treatment  
39 184 decision:

40  
41  
42  
43  
44  
45 185 *"if we see it is 89% we change the probe or change the finger" (Hospital, Bangladesh)*

46  
47 186 However, questioning the validity of these lower SpO<sub>2</sub> results in the context of a child's clinical  
48 187 condition was only discussed by the HCPs who worked in the hospital setting. This difference in the  
49 188 trust placed in the SpO<sub>2</sub> results by different types of HCPs suggests that more in-depth clinical  
50 189 training and understanding of the technology may result in different clinical applications:

51  
52  
53  
54  
55 190 *"sometimes the pulse oximeter can give readings which you are not comfortable with according to*  
56 191 *the presentation of the child [...] most of the time when it happens like that, we just use our*  
57 192 *judgement" (Hospital, Malawi)*

1  
2  
3 193 An outcome of using pulse oximeters for pneumonia diagnosis was a change in parental and  
4 194 community understanding and perceptions of care, with HCPs discussing increased trust in their  
5 195 referral and treatment decisions. This worked in two ways, firstly with the oximeter acting as a direct  
6 196 feedback and education tool:

7  
8  
9  
10 197 *"if the mother is able to read you can show the exact figure and she will accept the treatment of*  
11 198 *oxygen, [before] it was very difficult to explain the role or the importance of the oxygen machine and*  
12 199 *some mothers refused"* (Hospital, Malawi)

13  
14  
15  
16 200 Secondly, in Malawi HCPs projected that the oximeters had improved clinical care, and therefore  
17 201 outcomes, which led caregivers to be more inclined to accept the referral or treatment being  
18 202 recommended, especially in the case of oxygen:

19  
20  
21 203 *"[previously] in the village they were saying that when a child is put on the oxygen machine it*  
22 204 *facilitates death, therefore it was making problems, but this time because children are put on oxygen*  
23 205 *earlier they survive, it's because we knew the saturation"* (Health centre, Malawi)

24  
25  
26  
27 206 Value

28  
29  
30 207 The theme of value relates to the inherent value of improved decision making, HCPs perceived self-  
31 208 value (i.e. confidence) in their clinical work, and the physical value placed on maintaining a working  
32 209 pulse oximeter. As pneumonia is classified using a range of non-specific and often subjective clinical  
33 210 signs, HCPs discussed the positive addition of this more objective measure:

34  
35  
36  
37 211 *"...by looking at this we can understand how much respiratory distress is in there. Of course this helps*  
38 212 *us a lot."* (Health Centre, Bangladesh)

39  
40  
41 213 In both sites HCPs from frontline settings (CHWs, health centres and UHCs) stated that the pulse  
42 214 oximeters had changed the way they work and given them confidence in making referral decisions.  
43 215 Interestingly however, in the referral hospital setting in Bangladesh where staff training is higher,  
44 216 very little value was placed on the pulse oximeter for improving their clinical performance, with the  
45 217 ability to conduct chest x-rays, lung ultra-sound and their clinical judgement valued more highly:

46  
47  
48 218 *"...its sensitivity and specificity is very negligible to be taken as a diagnostic tool."* (Hospital,  
49 219 Bangladesh)

50  
51  
52  
53  
54 220 In Bangladesh the CHWs reported pride in using the oximeters. In Malawi, the CHWs (who  
55 221 individually own the oximeters) placed a physical value on the oximeters and discussed the personal  
56 222 effort, such as paying out of pocket for charging, they put in to maintaining a working device:

1  
2  
3 223 *"...we have been trying all that is humanly possible to take care of these things, but it only becomes a*  
4 224 *problem when it comes to the issue of charging."* (CHW, Malawi)

5  
6  
7 225 This was also reflected at the health centre, where not all facilities have electricity and one or two  
8 226 staff are responsible for assessing children; at the referral hospital however this was not discussed,  
9 227 with oximeters belonging to the ward, which has a more consistent power supply. Ward-based  
10 228 ownership was discussed as a challenge by hospital staff, suggesting individual ownership could  
11 229 result in improved care and maintenance.

12  
13  
14  
15  
16 230 *"...some of the clinicians do not take care of them, so when the machine is not working it means the*  
17 231 *whole department is affected"* (Hospital, Malawi)

18  
19  
20 232 User-related experience

21  
22 233 HCPs at all levels discussed their experiences of using pulse oximeters in children under 5-years,  
23 234 presenting challenges, their solutions and perceptions of usability. The time taken to get a  
24 235 measurement ranged widely, with CHWs in Bangladesh agreeing measurements took less than 1  
25 236 minute but in Malawi that it could take up to 20 minutes. The factors that increased the time taken  
26 237 to get a measurement were consistently cited as movement and physically smaller children, and in  
27 238 Malawi dirty toes making measurements difficult:

28  
29  
30 239 *"Getting readings from irritable babies is a bit tough and it takes time."* (Health centre, Bangladesh)

31  
32  
33 240 *"...using it on a child up to six months of age, sometimes it has been a problem because these*  
34 241 *children have got small fingers, so although we use toes sometimes they are also small and the child*  
35 242 *is afraid so they start crying. So we have got other things we can give a child to play with but it is a*  
36 243 *little bit of a problem, but at the end we get the results."* (CHW, Malawi)

37  
38  
39 244 Solutions to these challenging children included asking caregivers to breastfeed, giving them a toy to  
40 245 distract them, and simply waiting. The term used frequently to describe challenging children was  
41 246 'fear', with the HCPs stating that children are afraid of having the measurements taken and even  
42 247 that the sensors' red light caused this fear. Despite these issues in small and agitated infants, the  
43 248 oximeters were considered easy to use:

44  
45  
46 249 *"...it's not complicated, it doesn't need complicated education for a healthcare worker to use, with a*  
47 250 *good explanation from a colleague or friend you are able to use it."* (Hospital, Malawi)

1  
2  
3 251 There was also the acknowledgement that time to reading was not as important as getting the  
4  
5 252 correct measurement; for some respondents, the reason some measurements take longer is the  
6  
7 253 desire to get a reliable reading. This included cleaning the child's digits or repositioning the probe:  
8  
9 254 *"...taking longer does not mean that one doesn't know the procedure, but sometime it's because you*  
10  
11 255 *want to give the correct reading."* (CHW, Malawi)

12  
13 256 A key challenge reported by frontline HCPs in Malawi was around keeping the oximeter charged; this  
14  
15 257 was not considered a significant challenge in Bangladesh. However, here they had issues with  
16  
17 258 ensuring the oximeter remained dry and protected during rains and being fully waterproof was  
18  
19 259 desirable. Depending on usage, battery life was reported as 1 week – 2 months. In Malawi, none of  
20  
21 260 the CHWs and only some of the health centres have access to electricity for charging the re-usable  
22  
23 261 batteries, and therefore they reported travelling to use commercial charging services:

24  
25 262 *"Most of the times we take the pulse oximeter to the trading centre and charge it, then we pay for*  
26  
27 263 *that only to make sure that we are working, but sometimes you also feel you become bankrupt."*  
28  
29 264 (Health centre, Malawi)

#### 30 Sustainability

31  
32 266 Sustainability was discussed in terms of the device's durability, and the need for continued  
33  
34 267 professional development. Generally the pulse oximeters were thought of as robust and durable,  
35  
36 268 with some of the HCPs having used their device for over four years without replacements. However,  
37  
38 269 the battery was highlighted as the least durable part of the device, and there was a perception that  
39  
40 270 when the battery was worn down the readings became less reliable.

41  
42 271 *"There is a matter with the battery too, if the battery is not enough the reading takes a long time to*  
43  
44 272 *appear. It sometimes gives false negative readings."* (Hospital, Bangladesh)

45  
46 273 This related to the HCPs suggestion of having on-going maintenance support rather than wanting  
47  
48 274 replacement devices. HCPs described the need for on-going training and support, but also expressed  
49  
50 275 a desire for more in-depth education on how oximetry works which goes beyond the basic training  
51  
52 276 to take a reliable measurement:

53  
54 277 *"A person gets used to what they are doing once they have been oriented. I think sometimes it's also*  
55  
56 278 *good for you and your team to orient us on how this thing works [...] the way this thing works, we*  
57  
58 279 *don't know"* (Health centre, Malawi)

1  
2  
3 280 In terms of keeping the devices clean, we found conflicting opinions between Malawi and  
4  
5 281 Bangladesh. Malawi deemed the probes easy to clean and store securely, although the light colour  
6  
7 282 and materials of the device was thought to show dirt easily. However, in Bangladesh cleaning was  
8  
9 283 described as burdensome; this likely reflects the different devices and therefore methods needed for  
10  
11 284 cleaning, or different perceptions of the importance and frequency of cleaning.

12 285 *"It is hard work to clean it with hexsol and cotton after coming back from the field every day. If we*  
13  
14 286 *could get something else to clean it with so that we can clean once a week, I don't like cleaning it*  
15  
16 287 *every day."* (CHW, Bangladesh)

17  
18 288 Design

19  
20 289 The key challenges mentioned repeatedly across sites and HCP cadres were the battery, sensitivity of  
21  
22 290 the probe in relation to movement or low perfusion, and the probe fit in younger children. Box 1  
23  
24 291 summarises the design features requested or suggested to improve the pulse oximeters for use in  
25  
26 292 these low-resource settings.

27  
28 293 The oximeters which HCPs used were designed for continuous monitoring; therefore oxygen  
29  
30 294 saturation is not a single static result. This was seen as a negative, with HCPs in both sites wanting  
31  
32 295 the ability to stop at a result and even store measurements (e.g. a blood glucose monitor):

33 296 *"Readings would fluctuate if the baby moves. We don't want that. After getting the actual reading it*  
34  
35 297 *should stay fixed."* (CHW, Bangladesh)

36  
37 298 In Bangladesh specifically, the CHWs stated a preference for numbers or bars to indicate  
38  
39 299 measurement quality, rather than a dynamic waveform display. This opinion was not reflected in  
40  
41 300 Malawi, which could be a result of using different devices or different training. A specific challenge  
42  
43 301 presented by CHWs in Malawi was the use of the oximeter in direct sunlight; CHWs often hold clinics  
44  
45 302 outside and they faced the combined challenges of bright sunlight and dust, both of which they  
46  
47 303 reported as challenges in taking measurements.

48 304 *"...it returns the correct results when you are in the shade, but while you are in sunlight it fails to*  
49  
50 305 *determine good results."* (CHW, Malawi)

51  
52 306 Positive design features included the portability of devices, the ease of using them and perceived  
53  
54 307 durability, with little direct criticism of the oximeters that the HCPs had been using:

55  
56 308 *"...of the things I like most about using the pulse oximeter, the first one is the portability, because I*  
57  
58 309 *can use it anywhere."* (Hospital, Malawi)

1  
2  
3 310  
4  
5

6 311 **Discussion**

7  
8 312 We investigated end-user experiences of using pulse oximeters by a range of different HCPs across  
9  
10 313 clinical settings in Malawi and Bangladesh. The FGDs highlighted similarities in experience, such as  
11  
12 314 challenges in battery durability, the difficulty of small and agitated children and the positive impact  
13  
14 315 of oximeters on clinical practice. However, there were key differences between Malawi and  
15  
16 316 Bangladesh and between HCP cadres.

17  
18 317 Of note was the difference in perceived ease of cleaning, which was seen as more burdensome in  
19  
20 318 Bangladesh. This is likely associated with the Y-shaped wrap probe design, compared to the more  
21  
22 319 easily cleaned clip design used in Malawi (Figure 1). Interestingly though, most critiques were similar  
23  
24 320 between sites, highlighting some of the major challenges of using pulse oximetry in children –  
25  
26 321 namely movement, low perfusion and small digits. This consistency between sites suggests these  
27  
28 322 challenges are not device dependent and therefore a specifically designed re-usable device for  
29  
30 323 universal paediatric use in low-resource settings is needed.

31  
32 324 We identified differences in the sense of value placed on the oximeters by HCPs, with the higher  
33  
34 325 trained HCPs attributing less value to the results than the HCPs with more limited training. Those  
35  
36 326 with more training valued their clinical judgement more and were more willing to question the  
37  
38 327 accuracy of SpO<sub>2</sub> results. This poses interesting lessons for scaling-up implementation and training,  
39  
40 328 as despite perceptions that obtaining a SpO<sub>2</sub> measurement is generally easy, the interpretation of  
41  
42 329 the result is more nuanced. Sustained mentorship and more in-depth training were desired by the  
43  
44 330 HCPs, and this needs to be considered as part of any implementation programme.

45  
46 331 As the oximeters were used as spot-check devices rather than continuous monitors, as would  
47  
48 332 generally be found in operating theatres or high-dependency care in high-income settings, many of  
49  
50 333 the suggested design changes related to improving the devices for this process. One example of this  
51  
52 334 was the need for improved battery-life and charging, with HCPs highlighting their limited ability to  
53  
54 335 easily access charging points, unlike high-income inpatient settings. Consistently, the desire for  
55  
56 336 quicker, static results and a movement tolerant probe with improved fit on younger infants was  
57  
58 337 important. Unexpected issues, such as usability in direct sunlight, emphasize the importance of end-  
59  
60 338 user engagement in product development as clinical devices designed for high-income settings  
339 would not need to be robust to outdoor use.

340  
341 340 The idea of a pulse oximeter being able to improve trust between a caregiver and healthcare  
provider poses potentially exciting opportunities for improving referral and treatment for paediatric

1  
2  
3 342 pneumonia. Early diagnosis and treatment as downstream in the health system as possible, ideally to  
4 343 the level of CHWs, are key strategies for improving pneumonia outcomes and therefore reducing  
5 344 morbidity and mortality burden<sup>23</sup>. Therefore, an objective and simple clinical tool with in-built  
6 345 decision support, e.g. auditory or visual alarms when the SpO<sub>2</sub> is outside of normal range, presents  
7 346 an opportunity for caregiver education and empowerment in the referral decision-making process.  
8 347 Recent data from Malawi supports this notion. Frontline Malawian HCPs using pulse oximeters  
9 348 during routine outpatient care demonstrated that among children with pneumonia who were  
10 349 clinically eligible for referral, children with a SpO<sub>2</sub> <90% were more than twice as likely to have been  
11 350 correctly referred compared to those with a SpO<sub>2</sub> ≥90%<sup>12</sup>. Interestingly, this has not necessarily been  
12 351 the case with other more objective diagnostic tools, with examples of rapid diagnostic malaria tests  
13 352 leading to provider-caregiver tensions around treatments<sup>24 25</sup>.

14 353 This study was potentially subject to social-desirability bias, with healthcare workers expressing  
15 354 opinions which they thought the facilitators wanted to hear. The purpose of the study was explained  
16 355 to the participants during the consent process, and was highlighted as an opportunity for them to  
17 356 contribute to the design of a revised paediatric oximeter and probe. To mitigate this potential bias,  
18 357 the facilitators encouraged the participants to be critical throughout, and the FGDs were conducted  
19 358 amongst peers, rather than between different HCP cadres with different educational backgrounds  
20 359 and social dynamics. Both positive and negative views were given in both Malawi and Bangladesh,  
21 360 and by different types of HCPs, therefore we do not feel this bias is likely to have impacted our  
22 361 findings.

23 362 Overall pulse oximeters were valued by HCPs, despite challenges with charging, maintenance and  
24 363 speed of achieving accurate readings in moving or smaller children. This implies that making  
25 364 improvements to currently available oximeters and probes could further facilitate successful  
26 365 implementation of this technology at the community through to the hospital level for routine  
27 366 paediatric care. Based on these data, we recommend that efforts to re-design a pulse oximeter for  
28 367 paediatric spot-checks focus on improvements to battery durability, better fit for smaller digits and  
29 368 the speed at which readings are obtained; these were all important challenges which did not  
30 369 necessarily have local solutions presented. More substantive design changes could focus on  
31 370 alternative power and charging systems (e.g. solar charging) and '3-in-1' devices which include  
32 371 respiratory rate and temperature measurements.



1  
2  
3 372 **Acknowledgments**  
4

5 373 We would like to thank all those healthcare providers who took part in the focus group discussions  
6  
7 374 for their time. We would like to acknowledge other members of the study team: Katie Fernandez  
8  
9 375 (Lifebox); Charles Makwenda and Tambosi Phiri (Parent and Child Health Initiative); Tim Colbourn  
10  
11 376 (University College London); Mike Bernstein (Physio Monitor); and Nazma Begum, Arun Dutta Roy  
12  
13 377 and Abu Abdullah Mohammad Hanif (Johns Hopkins University-Bangladesh).  
14

15 378

16  
17 379 **Funding**

18  
19 380 This study was funded by the Bill & Melinda Gates Foundation (grant number: OPP1133291).  
20  
21 381

22  
23  
24 382 **Conflict of Interest**

25  
26 383 Authors declare no conflicts of interest.  
27  
28 384

29  
30  
31 385 **Author contributions**

32  
33 386 The qualitative study was designed and topic guides developed by IWi, IWa, CK and EDM, and the  
34  
35 387 field manual written by CK. In Malawi, BZ and EK arranged, conducted, transcribed and translated  
36  
37 388 the FGDs. In Bangladesh SA and MI arranged and conducted the FGDs. The data was coded and  
38  
39 389 analysed by CK and KF. The manuscript was written by CK, with considerable input from KF and EDM.  
40  
41 390 All authors read, commented and approved the manuscript.  
42

43 391

44  
45 392 **Data Sharing Statement**

46  
47 393 Anonymised transcripts can be shared, following the signing of a data sharing agreement, subject to  
48  
49 394 approval from the relevant National ethics committees. For further information please contact Dr.  
50  
51 395 Carina King: c.king@ucl.ac.uk.  
52  
53  
54  
55  
56  
57  
58  
59  
60



396 **References**

- 397 1. Sazawal S, Black RE, Pneumonia Case Management Trials G. Effect of pneumonia case  
398 management on mortality in neonates, infants, and preschool children: a meta-analysis of  
399 community-based trials. *Lancet Infect Dis* 2003;**3**(9):547-56.
- 400 2. Niessen LW, ten Hove A, Hilderink H, et al. Comparative impact assessment of child pneumonia  
401 interventions. *Bull World Health Organ* 2009;**87**(6):472-80.
- 402 3. Walker CL, Rudan I, Liu L, et al. Global burden of childhood pneumonia and diarrhoea. *Lancet*  
403 2013;**381**(9875):1405-16.
- 404 4. Organisation WH. *Oxygen therapy for children: a manual for health workers*. Geneva: WHO, 2016.
- 405 5. . WHO Recommendations on the Management of Diarrhoea and Pneumonia in HIV-Infected  
406 Infants and Children: Integrated Management of Childhood Illness (IMCI). Geneva, 2010.
- 407 6. Orimadegun A, Ogunbosi B, Orimadegun B. Hypoxemia predicts death from severe falciparum  
408 malaria among children under 5 years of age in Nigeria: the need for pulse oximetry in case  
409 management. *Afr Health Sci* 2014;**14**(2):397-407.
- 410 7. Chhibber AV, Hill PC, Jafali J, et al. Child Mortality after Discharge from a Health Facility following  
411 Suspected Pneumonia, Meningitis or Septicaemia in Rural Gambia: A Cohort Study. *Plos One*  
412 2015;**10**(9):e0137095.
- 413 8. Hooli S, Colbourn T, Lufesi N, et al. Predicting Hospitalised Paediatric Pneumonia Mortality Risk:  
414 An External Validation of RISC and mRISC, and Local Tool Development (RISC-Malawi) from  
415 Malawi. *Plos One* 2016;**11**(12):e0168126.
- 416 9. Wandeler G, Pauchard JY, Zangger E, et al. Which clinical signs predict hypoxaemia in young  
417 Senegalese children with acute lower respiratory tract disease? *Paediatrics and International*  
418 *Child Health* 2015;**35**(1):65-68.
- 419 10. Basnet S, Adhikari RK, Gurung CK. Hypoxemia in children with pneumonia and its clinical  
420 predictors. *The Indian Journal of Pediatrics* 2006;**73**(9):777-81.
- 421 11. Lodha R, Bhadauria PS, Kuttikat AV, et al. Can Clinical Symptoms or Signs Accurately Predict  
422 Hypoxemia in Children with Acute Lower Respiratory Tract Infections? *Indian Pediatr*  
423 2003;**41**:129-35.
- 424 12. McCollum ED, King C, Deula R, et al. Pulse oximetry for children with pneumonia treated as  
425 outpatients in rural Malawi. *Bull World Health Organ* 2016;**94**:893-902.
- 426 13. Duke T, Subhi R, Peel D, et al. Pulse oximetry: technology to reduce child mortality in developing  
427 countries. *Ann Trop Paediatr* 2009;**29**(3):165-75.

- 1  
2  
3 428 14. Emdin CA, Mir F, Sultana S, et al. Utility and feasibility of integrating pulse oximetry into the  
4 429 routine assessment of young infants at primary care clinics in Karachi, Pakistan: a cross-  
5 430 sectional study. *BMC Pediatrics* 2015;**15**(1):141.  
6  
7  
8 431 15. King EM, Lieu C, Kasasa A, et al. Pulse Oximetry as a Screening Tool to Detect Hypoxia Associated  
9 432 with Early-onset Sepsis in Asymptomatic Newborns: A Feasibility Study in a Low-income  
10 433 Country. *British Journal of Medicine & Medical Research* 2014;**4**(5):1115-28.  
11  
12 434 16. Ginsburg AS, Izadnegahdar R, Klugman KP. World Pneumonia Day 2016: pulse oximetry and  
13 435 oxygen. *The Lancet Global Health* 2016;**4**(12):e893-e94.  
14  
15 436 17. Ginsburg AS, Van Cleve WC, Thompson MI, et al. Oxygen and pulse oximetry in childhood  
16 437 pneumonia: a survey of healthcare providers in resource-limited settings. *J Trop Pediatr*  
17 438 2012;**58**(5):389-93.  
18  
19 439 18. Spence H, Baker K, Wharton-Smith A, et al. Childhood pneumonia diagnostics: community health  
20 440 workers' and national stakeholders' differing perspectives of new and existing aids. *Glob*  
21 441 *Health Action* 2017;**10**(1):1290340.  
22  
23 442 19. Nsona H, Mtimuni A, Daelmans B, et al. Scaling up Integrated Community Case Management of  
24 443 Childhood Illness: Update from Malawi. *Am J Trop Med Hyg* 2012;**87**(Suppl 5):54-60.  
25  
26 444 20. Malawi Go. Integrated Management of Childhood Illness - Caring for Newborns and Children in  
27 445 the Community: Manual for Health Surveillance Assistants. In: Health Mo, ed. Lilongwe,  
28 446 Malawi, 2008.  
29  
30 447 21. Gale NK, Heath G, Cameron E, et al. Using the framework method for the analysis of qualitative  
31 448 data in multi-disciplinary health research. *BMC Medical Research Methodology*  
32 449 2013;**13**(1):117.  
33  
34 450 22. Ritchie J, Spencer L. Qualitative data analysis for applied policy research. *The qualitative*  
35 451 *researcher's companion* 2002;**573**:305-29.  
36  
37 452 23. McCollum ED, King C, Hammitt LL, et al. Reduction of childhood pneumonia mortality in the  
38 453 Sustainable Development era. *Lancet Respir Med* 2016;**4**(12):932-33.  
39  
40 454 24. Ansah EK, Reynolds J, Akanpigbiam S, et al. "Even if the test result is negative, they should be  
41 455 able to tell us what is wrong with us": a qualitative study of patient expectations of rapid  
42 456 diagnostic tests for malaria. *Malaria Journal* 2013;**12**(1):258.  
43  
44 457 25. Hutchinson E, Reyburn H, Hamlyn E, et al. Bringing the state into the clinic? Incorporating the  
45 458 rapid diagnostic test for malaria into routine practice in Tanzanian primary healthcare  
46 459 facilities. *Glob Public Health* 2015:1-15.  
47  
48  
49  
50  
51  
52  
53  
54  
55  
56 460

1  
2  
3  
4  
5  
6  
7  
8  
9  
10  
11  
12  
13  
14  
15  
16  
17  
18  
19  
20  
21  
22  
23  
24  
25  
26  
27  
28  
29  
30  
31  
32  
33  
34  
35  
36  
37  
38  
39  
40  
41  
42  
43  
44  
45  
46  
47  
48  
49  
50  
51  
52  
53  
54  
55  
56  
57  
58  
59  
60

| <b>Table 1:</b> Summary of the FGD participants and their work experience |                                                              |                                                 |                                                                                                                                                      |
|---------------------------------------------------------------------------|--------------------------------------------------------------|-------------------------------------------------|------------------------------------------------------------------------------------------------------------------------------------------------------|
|                                                                           | Community level                                              | Health centre or Upazila Health Complex         | Hospital                                                                                                                                             |
| <b>BANGLADESH</b>                                                         |                                                              |                                                 |                                                                                                                                                      |
| Total participants                                                        | 8                                                            | 7                                               | 8                                                                                                                                                    |
| Job titles (number)                                                       | Community healthcare worker (8)                              | Physician (4)<br>Medical officer (3)            | Senior staff nurse (1)<br>Associate professor (2)<br>ICU staff (1)<br>Anaesthesiologist (1)<br>Assistant registrar (1)<br>Intern medical officer (1) |
| Work experience (mean, range)                                             | 1.7 years (0.6 – 4)                                          | 2.3 years (1 – 6)                               | 14.7 years (0.5 – 32)                                                                                                                                |
| <b>MALAWI</b>                                                             |                                                              |                                                 |                                                                                                                                                      |
| Total participants                                                        | 9                                                            | 8                                               | 9                                                                                                                                                    |
| Job titles                                                                | Community healthcare worker (8)<br>Vital signs assistant (1) | Medical assistant (7)<br>Medical technician (1) | Clinical officer (3)<br>Nurse midwife (3)<br>Medical assistant (3)                                                                                   |
| Years' work experience (mean)                                             | 10.6 years (5 – 20)                                          | 8.3 years (3 – 23)                              | 8.1 years (4 – 13)                                                                                                                                   |

461

462

463 **Panel 1:** Suggestions of desirable features or improvements

| <b>Challenge:</b>            | <b>Design suggestion:</b>                                                                                                                                                                                                              |
|------------------------------|----------------------------------------------------------------------------------------------------------------------------------------------------------------------------------------------------------------------------------------|
| Probe fit                    | Supplied with multiple sizes of probes for different ages<br>A single cable with multiple probes that can be changed (e.g. clipped into the cable)<br>Softer material for a more comfortable fit                                       |
| Probe placement              | Probe made of transparent material so sensor placement on the nail can be seen                                                                                                                                                         |
| Cleaning                     | Alcohol wipes provided for easier cleaning<br>Different colour probe to make it easier to see the dirt, but does not look dirty quickly                                                                                                |
| Power                        | Solar powered charger with rechargeable batteries<br>Back-up power bank<br>Supplied with a spare battery                                                                                                                               |
| Agitated children            | Toy feature in the device to distract the child<br>Improve the sensitivity of the device to be quicker<br>Improve the sensitivity of the device to tolerate movement                                                                   |
| Integrated spot-check device | Store results in a memory that can later be accessed<br>Static oxygen saturation result display<br>'3-in-1' device which includes temperature and respiratory rate measurements as well<br>Shorter cable length for easier portability |

464

465 **Figure 1:** Pulse oximeters and probe used by healthcare providers in routine clinical care

- 466 a. Lifebox® oximeter and adult universal clip probe used in Malawi (accessed on 1<sup>st</sup> July 2017  
467 from: [www.lifebox.org](http://www.lifebox.org))

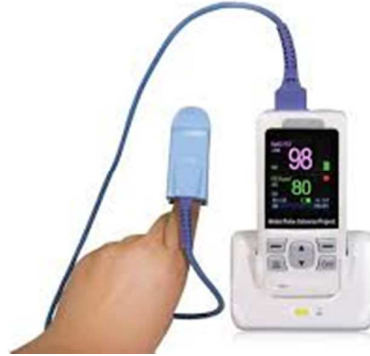

468

- 469 b. Masimo Rad5® oximeter and LNCS® Y-I Multisite wrap probe used in Bangladesh (accessed on  
470 1<sup>st</sup> July 2017 from: [www.pacificmedicalsupply.com](http://www.pacificmedicalsupply.com))

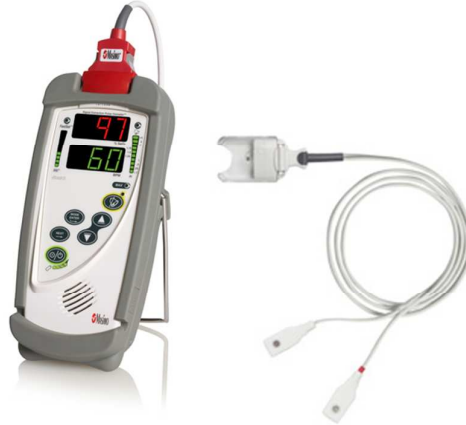

471

472

473

474

475

**Web Appendix 1 – Topic Guide**

- What is your experience of using pulse oximeters in children?
- What have been the main issues you've encountered when using pulse oximeters?
- What have been the things you like most about using the pulse oximeters?
- What type of probes have you used? Have any been better than others? Why?
- Thinking about the probes, we would like to hear your feedback about some aspects of using them: ease of putting and keeping the probe on the child, durability, ease of taking a reading, ease of keeping it clean and storage
- Thinking about the oximeter, we would like to hear your feedback about some aspects of using them: ease of reading the display, durability, battery life and charging, time taken to get a reading
- What things would make the probe and pulse oximeter easier to use?
- What things would make the probe and pulse oximeter harder to use?

# BMJ Open

## Opportunities and barriers in paediatric pulse oximetry for pneumonia in low-resource clinical settings: a qualitative evaluation from Malawi and Bangladesh

|                                 |                                                                                                                                                                                                                                                                                                                                                                                                                                                                                                                                                                                                                                                                                                                                                                                                                                                                                                                                                                                                                                                                    |
|---------------------------------|--------------------------------------------------------------------------------------------------------------------------------------------------------------------------------------------------------------------------------------------------------------------------------------------------------------------------------------------------------------------------------------------------------------------------------------------------------------------------------------------------------------------------------------------------------------------------------------------------------------------------------------------------------------------------------------------------------------------------------------------------------------------------------------------------------------------------------------------------------------------------------------------------------------------------------------------------------------------------------------------------------------------------------------------------------------------|
| Journal:                        | <i>BMJ Open</i>                                                                                                                                                                                                                                                                                                                                                                                                                                                                                                                                                                                                                                                                                                                                                                                                                                                                                                                                                                                                                                                    |
| Manuscript ID                   | bmjopen-2017-019177.R1                                                                                                                                                                                                                                                                                                                                                                                                                                                                                                                                                                                                                                                                                                                                                                                                                                                                                                                                                                                                                                             |
| Article Type:                   | Research                                                                                                                                                                                                                                                                                                                                                                                                                                                                                                                                                                                                                                                                                                                                                                                                                                                                                                                                                                                                                                                           |
| Date Submitted by the Author:   | 10-Oct-2017                                                                                                                                                                                                                                                                                                                                                                                                                                                                                                                                                                                                                                                                                                                                                                                                                                                                                                                                                                                                                                                        |
| Complete List of Authors:       | King, C.; University College London Institute for Global Health, Boyd, Nicholas; Great Ormond Street Hospital For Children NHS Trust, UCL Institute of Child Health<br>Walker, Isabeau; Great Ormond Street Hospital For Children NHS Trust, UCL Institute of Child Health<br>Zadutsa, Beatiwel; Parent and Child Health Initiative<br>Baqui, Abdullah; Johns Hopkins University Bloomberg School of Public Health, International Center for Maternal and Newborn Health<br>Ahmed, Salahuddin; Johns Hopkins University Bloomberg School of Public Health, International Center for Maternal and Newborn Health<br>Islam, Mazharul; Shahjalal University of Science and Technology, Department of Anthropology<br>Kainja, Esther; Parent and Child Health Initiative<br>Nambiar, Bejoy; Institute for Global Health<br>Wilson, Iain; Lifebox Foundation<br>McCollum, Eric ; Johns Hopkins School of Medicine, Eudowood Division of Paediatric Respiratory Diseases; Johns Hopkins University Bloomberg School of Public Health, Department of International Health |
| <b>Primary Subject Heading</b>: | Global health                                                                                                                                                                                                                                                                                                                                                                                                                                                                                                                                                                                                                                                                                                                                                                                                                                                                                                                                                                                                                                                      |
| Secondary Subject Heading:      | Paediatrics, Respiratory medicine, Qualitative research, Diagnostics                                                                                                                                                                                                                                                                                                                                                                                                                                                                                                                                                                                                                                                                                                                                                                                                                                                                                                                                                                                               |
| Keywords:                       | Pulse oximeter, Oxygen saturation, Pneumonia, Children, Sub-Saharan Africa, South Asia                                                                                                                                                                                                                                                                                                                                                                                                                                                                                                                                                                                                                                                                                                                                                                                                                                                                                                                                                                             |
|                                 |                                                                                                                                                                                                                                                                                                                                                                                                                                                                                                                                                                                                                                                                                                                                                                                                                                                                                                                                                                                                                                                                    |

SCHOLARONE™  
Manuscripts

1  
2  
3 1 **Title:** Opportunities and barriers in paediatric pulse oximetry for pneumonia in low-resource clinical  
4 2 settings: a qualitative evaluation from Malawi and Bangladesh  
5  
6

7 3

8  
9 4 **Authors:** Carina King<sup>1\*</sup>, Nicholas Boyd<sup>2</sup>, Isabeau Walker<sup>2</sup>, Beatiwel Zadutsa<sup>3</sup>, Abdullah H. Baqui<sup>4</sup>,  
10 5 Salahuddin Ahmed<sup>4</sup>, Mazharul Islam<sup>5</sup>, Esther Kainja<sup>3</sup>, Bejoy Nambiar<sup>1</sup>, Iain Wilson<sup>6</sup>, Eric D.  
11 6 McCollum<sup>7,8</sup>  
12  
13

14 7

15  
16  
17 8 **Affiliations:**

- 18  
19 9 1. Institute for Global Health, University College London, London, UK  
20 10 2. Great Ormond Street Hospital NHS Foundation Trust, UCL Institute of Child Health, London,  
21 11 UK  
22 12 3. Parent and Child Health Initiative, Lilongwe, Malawi  
23 13 4. International Center for Maternal and Newborn Health, Johns Hopkins Bloomberg School of  
24 14 Public Health, Baltimore, USA  
25 15 5. Department of Anthropology, Shahjalal University of Science and Technology, Sylhet,  
26 16 Bangladesh  
27 17 6. Lifebox Foundation, London, UK  
28 18 7. Eudowood Division of Pediatric Respiratory Diseases, Johns Hopkins School of Medicine,  
29 19 Baltimore, USA  
30 20 8. Department of International Health, Johns Hopkins Bloomberg School of Public Health,  
31 21 Baltimore, USA  
32  
33  
34  
35  
36  
37  
38  
39  
40  
41

42 23 **\*Corresponding author:**

43  
44 24 Address: Institute for Global Health, 30 Guilford Street, London, WC1N 1EH; Email: [c.king@ucl.ac.uk](mailto:c.king@ucl.ac.uk);  
45 25 telephone: +44 (0) 2076797619  
46  
47  
48  
49  
50

51 27 **Keywords:** Pulse oximeter, oxygen saturation, pneumonia, sub-Saharan Africa, South Asia, children  
52  
53  
54  
55

56 29 **Word Count:** 4,039  
57  
58  
59  
60



1  
2  
3 30 **Abstract**  
4

5 31 *Objective:* To gain an understanding of what challenges pulse oximetry for paediatric pneumonia  
6  
7 32 management poses, how it has changed service provision and what would improve this device for  
8  
9 33 use across paediatric clinical settings in low-income countries.

10  
11 34 *Design:* Focus group discussions (FGDs), with purposive sampling and thematic analysis using a  
12  
13 35 framework approach.

14  
15 36 *Setting:* Community, front line outpatient and hospital outpatient and inpatient settings in Malawi  
16  
17 37 and Bangladesh, which provide paediatric pneumonia care.

18  
19 38 *Participants:* Healthcare providers (HCPs) from Malawi and Bangladesh who had received training in  
20  
21 39 pulse oximetry and had been using oximeters in routine paediatric care, including community  
22  
23 40 healthcare workers, non-physician clinicians or medical assistants, and hospital-based nurses and  
24  
25 41 doctors.

26  
27 42 *Results:* We conducted six FGDs, with 23 participants from Bangladesh and 26 from Malawi. We  
28  
29 43 identified five emergent themes: trust; value; user-related experience; sustainability; and design.  
30  
31 44 HCPs discussed the confidence gained through using oximeters, resulting in improved trust from  
32  
33 45 caregivers and valuing the device; although there were conflicts between the weight given to clinical  
34  
35 46 judgement versus oximeter results. HCPs reported the ease of using oximeters, but identified  
36  
37 47 movement and physically smaller children as measurement challenges. Challenges in sustainability  
38  
39 48 related to battery durability and replacement parts were reported, however many HCPs had used  
40  
41 49 the same device longer than four years demonstrating robustness within these settings. Desirable  
42  
43 50 features included back-up power banks and integrated respiratory rate and thermometer capability.

44  
45 51 *Conclusions:* Pulse oximetry was generally deemed valuable by HCPs for use as a spot-check device  
46  
47 52 in a range of paediatric low-income clinical settings. Areas highlighted as challenges by HCPs, and  
48  
49 53 therefore opportunities for re-design, included battery charging and durability, probe fit and  
50  
51 54 sensitivity in paediatric populations.  
52  
53  
54  
55  
56  
57  
58  
59  
60

1  
2  
3 55 **Strengths and Limitations**  
4

- 5 56 • This is the first study to report on end-user perceptions of opportunities, challenges and  
6 57 desirable design features of pulse oximeters used for paediatric pneumonia management in  
7 58 low-resource settings, including community and outpatient providers.  
8  
9 59 • A key strength was the wide range of healthcare provider perspectives included, from  
10 60 community to referral hospital settings in South Asia and sub-Saharan Africa.  
11  
12 61 • The study was limited to participant's experience of using specific pulse oximeters and  
13 62 therefore may lack generalizability to other paediatric pulse oximeters not used in these  
14 63 settings.  
15  
16 64

## 65 Introduction

66 Several interventions, such as Pneumococcal conjugate vaccine (PCV) and standardised guidelines  
67 for diagnosis and treatment, have led to reductions in pneumonia morbidity and mortality over the  
68 last twenty years<sup>1,2</sup>. However, in spite of these gains, pneumonia remains the leading cause of  
69 infectious mortality amongst children globally, with the vast majority of the burden falling in sub-  
70 Saharan Africa and south Asia<sup>3</sup>. To accelerate reductions in pneumonia mortality, further  
71 refinement of diagnosis and treatment pathways are needed, including correct referral and access to  
72 oxygen treatment<sup>4</sup>.

73 Pulse oximetry non-invasively measures peripheral arterial oxyhemoglobin saturation (SpO<sub>2</sub>).  
74 Hypoxemia (defined as an SpO<sub>2</sub> <90%) is included in the World Health Organization (WHO)  
75 guidelines as a pneumonia danger sign<sup>5</sup>, and is associated with increased mortality from  
76 pneumonia, as well as other illnesses like malaria<sup>6-8</sup>. Recent evidence from Malawi has also  
77 indicated that a SpO<sub>2</sub> 90-92% is predictive of mortality amongst children hospitalized with  
78 pneumonia<sup>8</sup>.

79 While some studies have attempted to predict hypoxemia in children with pneumonia using a  
80 combination of clinical signs, there has been mixed success<sup>9-11</sup>. Clinical signs alone fail to identify a  
81 proportion of hypoxemic children based on the current WHO guidelines, which results in a missed  
82 opportunity for referral and appropriate treatment<sup>12,13</sup>. In addition, the subjectivity of clinical signs  
83 can lead to variation in care – especially among community healthcare workers (CHWs), who often  
84 lack ongoing supervision.

85 Pulse oximeters have been successfully used in low-resource paediatric settings, but are yet to be  
86 widely adopted, particularly during outpatient care<sup>14,15</sup>. The Ethiopian Ministry of Health has  
87 demonstrated leadership in this area, setting up an initiative in 2016 to ensure oximetry and oxygen  
88 therapy are available nationally across the healthcare system<sup>16</sup>. However, Ethiopia is an exception,  
89 with implementation of oximetry in other developing countries continuing to be slow.  
90 Implementation barriers cited include cost, lack of appropriately designed, robust oximeters and  
91 universal paediatric probes and issues with training and supervision<sup>17</sup>.

92 In order to better understand current barriers to use of pulse oximetry by healthcare providers  
93 (HCPs) in a range of healthcare settings, and explore opportunities that this technology provides,  
94 input from end-users is needed<sup>18</sup>. With the ultimate goal of designing a universal paediatric probe  
95 for all levels of healthcare services in resource-poor settings, we aimed to gain an understanding of  
96 the challenges of pulse oximetry, how its use has changed service provision and how current devices

97 could be improved for these settings. This end-user perspective is currently limited in the literature  
98 and is essential to ensure investment in pulse oximetry is sustainable and effective.

99

## 100 **Methods**

101 We conducted a qualitative study with HCPs from different levels of the healthcare system in from  
102 one site in Malawi (Mchinji district, central region) and one in Bangladesh (Sylhet district, northeast  
103 region) from May – July 2016, as part of a wider programme of work aiming to design a universal  
104 paediatric oximeter probe.

### 105 Setting:

106 In Malawi there are three levels of government provided healthcare: CHWs (locally known as Health  
107 Surveillance Assistants), health centres and district hospitals. CHWs conduct weekly or bi-weekly  
108 village clinics and home visits providing basic integrated community case management (iCCM) for  
109 paediatric infections<sup>19 20</sup>. Health centres are outpatient facilities run by nurses, clinical officers or  
110 medical assistants, and District Hospitals have inpatient facilities with capacity for oxygen treatment.  
111 In Mchinji, pulse oximetry was successfully introduced into all three healthcare settings in 2012 as  
112 part of a PCV research project, using the Aicare Technology AH-MX manufactured Lifebox® oximeter  
113 and universal adult clip probe (Figure 1a)<sup>12</sup>.

114 In Bangladesh, the study was conducted at Projahnmo, a research consortium comprised of Johns  
115 Hopkins University and several local non-governmental organizations in partnership with the  
116 Bangladesh Ministry of Family Health and Welfare. Current Projahnmo activities are integrated  
117 within three government-operated sub-district hospitals, called Upazila Health Complexes (UHCs),  
118 and the referral government hospital in Sylhet city (Osmani Medical College), all of which are staffed  
119 by physicians and nurses. The UHCs operate outpatient clinics for children under five and provide  
120 basic inpatient paediatric care, including oxygen. The majority of government provided inpatient  
121 care is provided at Osmani Medical College. Female CHWs employed by Projahnmo conduct  
122 bimonthly household surveillance, with a subset of CHWs providing weekly surveillance as a part of a  
123 PCV effectiveness study. Projahnmo CHWs conduct basic clinical assessments and refer ill children  
124 for care at the UHCs; they do not administer medicines themselves. Since 2015, a National Institutes  
125 of Health-funded study (K01TW009988) trained and supplied all Projahnmo clinical staff in  
126 Bangladesh, including CHWs, with pulse oximeters to screen children for hypoxemia, using the  
127 Masimo Rad5® oximeter and the LNCS® Y-I Multisite wrap probe (Figure 1b).

1  
2  
3 128 In Malawi, CHWs individually own the oximeters, and facilities were given a device for each clinic or  
4 129 ward, while in Bangladesh, Projahnmo owns the oximeters and individual healthcare providers are  
5  
6 130 responsible for routine care and maintenance of the devices. Oximetry was not included in the  
7  
8 131 Malawi paediatric guidelines, and Bangladesh did not have national paediatric pneumonia guidelines  
9 132 at the time of the study.

10  
11 133 Design:

12  
13  
14 134 We conducted focus group discussions (FGDs). We planned three FGDs in each country, aiming to  
15 135 recruit between 6 and 10 people for each FGD (up to 60 participants in total). This number of groups  
16 136 was agreed upon before data collection began, driven by practical considerations given few  
17 137 healthcare workers in either setting have experience using pulse oximeters with children. The groups  
18 138 were planned to be CHWs, health centre or UHC staff, and referral hospital staff separately.  
19  
20 139 Conducting separate FGDs for the different types of healthcare workers was to allow context-specific  
21 140 discussions and encourage participants with varying training backgrounds to feel confident about  
22 141 raising challenges relevant to their specific setting.

23  
24  
25  
26  
27 142 Sampling:

28  
29 143 HCPs were purposefully sampled from sites where pulse oximetry had been introduced, and the  
30 144 participants had received some form of training or mentorship in oximetry. Participants were  
31 145 identified by local researchers (BZ in Malawi and SA in Bangladesh) to be a representative sample of  
32 146 HCPs from their setting (e.g. small and large health centres, inpatient wards and outpatient  
33 147 departments in the hospital), and contacted directly by phone. All HCPs contacted participated.  
34 148 Participants were reimbursed for their travel costs to the local healthcare facility and provided with  
35 149 refreshments.

36  
37  
38  
39  
40  
41 150 Procedure:

42  
43 151 FGDs were led by local researchers with experience in conducting qualitative research, with support  
44 152 from a facilitator with knowledge of pulse oximeters. The FGDs were divided into two sections, the  
45 153 first addressing the participants' personal experience with using pulse oximeters. The topic guide  
46 154 included: positive and negative experiences, and possible improvements and challenges (Web  
47 155 appendix 1). During the second part of the discussion, the participants were presented with different  
48 156 probe designs and given an opportunity to use them for an hour (Web appendix 2). Following this,  
49 157 the discussion addressed positive and negative aspects of the different designs to encourage critical  
50 158 thinking of possible design solutions to the current limitations of a universal paediatric probe.  
51  
52  
53  
54  
55  
56  
57  
58  
59  
60

1  
2  
3 159 The FGDs were audio recorded and then transcribed, along with the facilitators notes. Questions  
4 160 were asked in a mix of English and local dialects depending on understanding and ease of expression  
5 161 (Chichewa, Bangla or Sylheti) and participants were told to answer in their preferred language.  
6  
7 162 Responses were clarified by facilitators if there was an issue with language and understanding  
8  
9 163 between participants. Recordings were transcribed and translated where necessary. Translations for  
10  
11 164 Malawi were done by BZ and EK together until final transcripts were agreed, and by an independent  
12  
13 165 professional service for Bangladesh.

#### 14 15 166 Analysis:

16  
17 167 We analysed the data thematically using a framework approach, as an appropriate method for a  
18  
19 168 multi-disciplinary team conducting health research<sup>21</sup>. This process involves five steps:  
20  
21 169 familiarisation, identifying a thematic framework, indexing, mapping and interpretation<sup>22</sup>. The  
22  
23 170 transcripts and notes from the FGDs were printed and coded on paper, with the coding matrix  
24  
25 171 created in Microsoft Excel. CK and KF independently familiarised themselves and indexed the data,  
26  
27 172 and the emergent themes were discussed until a consensus was reached on the mapping and  
28  
29 173 interpretation of the data. This interpretation was shared with the local researchers (BZ and EK in  
30  
31 174 Malawi; EDM and MI in Bangladesh) for further discussion until all were in agreement.

#### 32 33 175 Ethics:

34  
35 176 Written informed consent was obtained from all FGD participants. This study was reviewed and  
36  
37 177 approved by the University College London research ethics committee (8075/003), Johns Hopkins  
38  
39 178 Medicine Institutional Review Board (IRB00047406), the Malawi National Health Sciences Research  
40  
41 179 Committee (16/4/1570) and Bangladesh Medical Research Council (BMRC/NREC/2013-2016/1272).

42  
43 180

#### 44 45 181 **Results**

46  
47 182 We conducted six FGDs, with 23 participants from Bangladesh and 26 from Malawi (Table 1). We  
48  
49 183 identified five emergent themes: trust; value; user-related experience; sustainability; and design.

#### 50 51 184 Trust

52  
53 185 Trust emerged as a theme both in terms of how the HCPs interpret the oximetry results, and how  
54  
55 186 caregivers interact with HCPs and the pulse oximeter. We found that all cadres of HCPs in both sites  
56  
57 187 had an awareness of the fallibility of the oximetry readings, specifically relating to lower SpO<sub>2</sub> values.  
58  
59 188 For SpO<sub>2</sub> levels which were deemed abnormal, <90% up to <95% according to different participants,

1  
2  
3 189 HCPs stated that they would often re-check the result before making a referral or treatment  
4 190 decision:

5  
6  
7 191 *"if we see it is 89% we change the probe or change the finger" (Hospital, Bangladesh)*

8  
9 192 However, questioning the validity of these lower SpO<sub>2</sub> results in the context of a child's clinical  
10 193 condition was only discussed by the HCPs who worked in the hospital setting. This difference in the  
11 194 trust placed in the SpO<sub>2</sub> results by different types of HCPs suggests that more in-depth clinical  
12 195 training and understanding of the technology may result in different clinical applications:

13  
14  
15  
16 196 *"sometimes the pulse oximeter can give readings which you are not comfortable with according to*  
17 197 *the presentation of the child [...] most of the time when it happens like that, we just use our*  
18 198 *judgement"* (Hospital, Malawi)

19  
20  
21  
22 199 An outcome of using pulse oximeters for pneumonia diagnosis was a change in parental and  
23 200 community understanding and perceptions of care, with HCPs discussing increased trust in their  
24 201 referral and treatment decisions. This worked in two ways, firstly with the oximeter acting as a direct  
25 202 feedback and education tool:

26  
27  
28  
29 203 *"if the mother is able to read you can show the exact figure and she will accept the treatment of*  
30 204 *oxygen, [before] it was very difficult to explain the role or the importance of the oxygen machine and*  
31 205 *some mothers refused"* (Hospital, Malawi)

32  
33  
34 206 Secondly, in Malawi HCPs projected that the oximeters had improved clinical care, and therefore  
35 207 outcomes, which led caregivers to be more inclined to accept the referral or treatment being  
36 208 recommended, especially in the case of oxygen:

37  
38  
39  
40 209 *"[previously] in the village they were saying that when a child is put on the oxygen machine it*  
41 210 *facilitates death, therefore it was making problems, but this time because children are put on oxygen*  
42 211 *earlier they survive, it's because we knew the saturation"* (Health centre, Malawi)

#### 43 44 45 212 Value

46  
47  
48 213 The theme of value relates to the inherent value of improved decision making, HCPs perceived self-  
49 214 value (i.e. confidence) in their clinical work, and the physical value placed on maintaining a working  
50 215 pulse oximeter. As pneumonia is classified using a range of non-specific and often subjective clinical  
51 216 signs, HCPs discussed the positive addition of this more objective measure:

52  
53  
54  
55 217 *"...by looking at this we can understand how much respiratory distress is in there. Of course this helps*  
56 218 *us a lot."* (Health Centre, Bangladesh)

1  
2  
3 219 In both sites HCPs from frontline settings (CHWs, health centres and UHCs) stated that the pulse  
4 220 oximeters had changed the way they work and given them confidence in making referral decisions.  
5  
6 221 Interestingly however, in the referral hospital setting in Bangladesh where staff training is higher,  
7  
8 222 very little value was placed on the pulse oximeter for improving their clinical performance, with the  
9  
10 223 ability to conduct chest x-rays, lung ultra-sound and their clinical judgement valued more highly:

11 224 *"...its sensitivity and specificity is very negligible to be taken as a diagnostic tool."* (Hospital,  
12  
13 225 Bangladesh)

14  
15 226 In Bangladesh the CHWs reported pride in using the oximeters. In Malawi, the CHWs placed a  
16  
17 227 physical value on the oximeters and discussed the personal effort, such as paying out of pocket to  
18  
19 228 travel commercial charging services, they put in to maintaining a working device:

20  
21 229 *"...we have been trying all that is humanly possible to take care of these things, but it only becomes a  
22  
23 230 problem when it comes to the issue of charging."* (CHW, Malawi)

24  
25 231 This was also reflected at the health centre, where not all facilities have electricity and one or two  
26  
27 232 staff are responsible for assessing children. At the referral hospital however this was not discussed,  
28  
29 233 with oximeters belonging to the ward, which has a more consistent power supply. Ward-based  
30  
31 234 ownership was discussed as a challenge, suggesting individual ownership could result in improved  
32  
33 235 care and maintenance as having a device in working order would not be dependent on the  
34  
35 236 performance of others.

36  
37 237 *"...some of the clinicians do not take care of them, so when the machine is not working it means the  
38  
39 238 whole department is affected"* (Hospital, Malawi)

### 39 User-related experience

40  
41 240 HCPs at all levels discussed their experiences of using pulse oximeters in children under 5-years,  
42  
43 241 presenting challenges, their solutions and perceptions of usability. The time taken to get a  
44  
45 242 measurement ranged widely, with CHWs in Bangladesh agreeing measurements took less than 1  
46  
47 243 minute but in Malawi that it could take up to 20 minutes. The factors that increased the time taken  
48  
49 244 to get a measurement were consistently cited as movement and physically smaller children, and in  
50  
51 245 Malawi dirty toes making measurements difficult:

52 246 *"Getting readings from irritable babies is a bit tough and it takes time."* (Health centre, Bangladesh)

53  
54 247 *"...using it on a child up to six months of age, sometimes it has been a problem because these  
55  
56 248 children have got small fingers, so although we use toes sometimes they are also small and the child*



1  
2  
3 249 *is afraid so they start crying. So we have got other things we can give a child to play with but it is a*  
4 250 *little bit of a problem, but at the end we get the results.”* (CHW, Malawi)

6  
7 251 Solutions to these challenging children included asking caregivers to breastfeed, giving them a toy to  
8 252 distract them, and simply waiting. The term used frequently to describe challenging children was  
9  
10 253 ‘fear’, with the HCPs stating that children are afraid of having the measurements taken. This fear was  
11 254 associated with the sensors’ red light which frightened children, the anticipation of pain, or just  
12  
13 255 being an unknown. All of these could result in the child being agitated, crying and uncooperative.  
14  
15 256 Despite these issues in small and agitated infants, the oximeters were considered easy to use:

16  
17 257 *“...it’s not complicated, it doesn’t need complicated education for a healthcare worker to use, with a*  
18 258 *good explanation from a colleague or friend you are able to use it.”* (Hospital, Malawi)

20  
21 259 There was also the acknowledgement that time to reading was not as important as getting the  
22 260 correct measurement; for some respondents, the reason some measurements take longer is the  
23  
24 261 desire to get a reliable reading. This included cleaning the child’s digits or repositioning the probe:

25  
26 262 *“...taking longer does not mean that one doesn’t know the procedure, but sometime it’s because you*  
27 263 *want to give the correct reading.”* (CHW, Malawi)

28  
29  
30 264 A key challenge reported by frontline HCPs in Malawi was around keeping the oximeter charged; this  
31 265 was not considered a significant challenge in Bangladesh. However, here they had issues with  
32  
33 266 ensuring the oximeter remained dry and protected during rains and being fully waterproof was  
34  
35 267 desirable. Depending on usage, battery life was reported as 1 week – 2 months.

### 36 37 268 Sustainability

38  
39  
40 269 Sustainability was discussed in terms of the device’s durability, and the need for continued  
41 270 professional development. Generally the pulse oximeters were thought of as robust and durable,  
42  
43 271 with some of the HCPs having used their device for over four years without replacements. However,  
44  
45 272 the battery was highlighted as the least durable part of the device, and there was a perception that  
46  
47 273 when the battery was worn down the readings became less reliable.

48  
49 274 *“There is a matter with the battery too, if the battery is not enough the reading takes a long time to*  
50 275 *appear. It sometimes gives false negative readings.”* (Hospital, Bangladesh)

51  
52 276 This related to the HCPs suggestion of having on-going maintenance support rather than wanting  
53  
54 277 replacement devices. HCPs described the need for on-going training and support, but also expressed

278 a desire for more in-depth education on how oximetry works which goes beyond the basic training  
279 to take a reliable measurement:

280 *“A person gets used to what they are doing once they have been oriented. I think sometimes it’s also*  
281 *good for you and your team to orient us on how this thing works [...] the way this thing works, we*  
282 *don’t know”* (Health centre, Malawi)

283 In terms of keeping the devices clean and properly stored, an important factor for prolonging shelf-  
284 life, we found conflicting opinions between Malawi and Bangladesh. Malawi deemed the probes  
285 easy to clean and store securely, although the light colour and materials of the device was thought  
286 to show dirt easily. However, in Bangladesh cleaning was described as burdensome; this likely  
287 reflects the different devices and therefore methods needed for cleaning, or different perceptions of  
288 the importance and frequency of cleaning.

289 *“It is hard work to clean it with hexsol and cotton after coming back from the field every day. If we*  
290 *could get something else to clean it with so that we can clean once a week, I don’t like cleaning it*  
291 *every day.”* (CHW, Bangladesh)

#### 292 Design

293 The key challenges mentioned repeatedly across sites and HCP cadres were the battery, sensitivity of  
294 the probe in relation to movement or low perfusion, and the probe fit in younger children. Panel 1  
295 summarises the design features requested or suggested to improve the pulse oximeters for use in  
296 these low-resource settings. Suggestions covered the probe, such as having detachable probes of  
297 different sizes, charging and battery life, such as additional power packs and solar charging, and  
298 features to help with agitated children.

299 The oximeters which HCPs used were designed for continuous monitoring; therefore oxygen  
300 saturation is not a single static result. This was seen as a negative, with HCPs in both sites wanting  
301 the ability to stop at a result and even store measurements (e.g. a blood glucose monitor):

302 *“Readings would fluctuate if the baby moves. We don’t want that. After getting the actual reading it*  
303 *should stay fixed.”* (CHW, Bangladesh)

304 In Bangladesh specifically, the CHWs stated a preference for numbers or bars to indicate  
305 measurement quality, rather than a dynamic waveform display. This opinion was not reflected in  
306 Malawi, which could be a result of using different devices or different training. A specific challenge  
307 presented by CHWs in Malawi was the use of the oximeter in direct sunlight; CHWs often hold clinics

1  
2  
3 308 outside and they faced the combined challenges of bright sunlight and dust, both of which they  
4 309 reported as challenges in taking measurements.

5  
6 310 *"...it returns the correct results when you are in the shade, but while you are in sunlight it fails to*  
7 311 *determine good results."* (CHW, Malawi)

8  
9  
10 312 Positive design features included the portability of devices, the ease of using them and perceived  
11 313 durability, with little direct criticism of the oximeters that the HCPs had been using:

12  
13  
14 314 *"...of the things I like most about using the pulse oximeter, the first one is the portability, because I*  
15 315 *can use it anywhere."* (Hospital, Malawi)

16  
17  
18 316

## 19 20 21 317 **Discussion**

22  
23 318 We investigated end-user experiences of using pulse oximeters by a range of different HCPs across  
24 319 clinical settings in Malawi and Bangladesh. The FGDs highlighted similarities in experience, such as  
25 320 challenges in battery durability, the difficulty of small and agitated children and the positive impact  
26 321 of oximeters on clinical practice. However, there were key differences between the providers'  
27 322 experiences in Malawi and Bangladesh and between HCP cadres.

28  
29  
30  
31 323 Of note was the difference in perceived ease of cleaning, which was seen as more burdensome in  
32 324 Bangladesh. This is likely associated with the Y-shaped wrap probe design, compared to the more  
33 325 easily cleaned clip design used in Malawi (Figure 1). Interestingly though, most critiques were similar  
34 326 between sites, highlighting some of the major challenges of using pulse oximetry in children –  
35 327 namely movement, low perfusion and small digits. This consistency between our sampled HCPs from  
36 328 each site suggests these challenges are not device dependent and therefore a specifically designed  
37 329 re-usable device for universal paediatric use in low-resource settings is needed.

38  
39  
40  
41 330 We identified differences in the sense of value placed on the oximeters by the HCPs, with the higher  
42 331 trained HCPs attributing less value to the results than the HCPs with more limited training. Those  
43 332 with more training valued their clinical judgement more and were more willing to question the  
44 333 accuracy of SpO<sub>2</sub> results. This poses interesting lessons for scaling-up implementation and training,  
45 334 as despite perceptions that obtaining a SpO<sub>2</sub> measurement is generally easy, the interpretation of  
46 335 the result is more nuanced. Sustained mentorship and more in-depth training were desired by the  
47 336 HCPs, and this needs to be considered as part of any implementation programme.

1  
2  
3 337 As the oximeters were used as spot-check devices rather than continuous monitors, as would  
4 338 generally be found in operating theatres or high-dependency care in high-income settings, many of  
5 339 the suggested design changes related to improving the devices for this process. One example of this  
6 340 was the need for improved battery-life and charging, with HCPs highlighting their limited ability to  
7 341 easily access charging points, unlike high-income inpatient settings. Consistently, the desire for  
8 342 quicker, static results and a movement tolerant probe with improved fit on younger infants was  
9 343 important. Unexpected issues, such as usability in direct sunlight, emphasize the importance of end-  
10 344 user engagement in product development as clinical devices designed for high-income settings  
11 345 would not need to be robust to outdoor use.

12  
13  
14  
15  
16  
17  
18 346 The idea of a pulse oximeter being able to improve trust between a caregiver and healthcare  
19 347 provider poses potentially exciting opportunities for improving referral and treatment for paediatric  
20 348 pneumonia. Early diagnosis and treatment as downstream in the health system as possible, ideally to  
21 349 the level of CHWs, are key strategies for improving pneumonia outcomes and therefore reducing  
22 350 morbidity and mortality burden<sup>23</sup>. Therefore, an objective and simple clinical tool with in-built  
23 351 decision support, e.g. auditory or visual alarms when the SpO<sub>2</sub> is outside of normal range, presents  
24 352 an opportunity for caregiver education and empowerment in the referral decision-making process.  
25 353 Recent data from Malawi supports the potential for oximetry to improve referral decision-making in  
26 354 frontline settings, with HCPs more than twice as likely to correctly refer children with a SpO<sub>2</sub> <90%  
27 355 compared to those with a SpO<sub>2</sub> ≥90% when using an oximeter during routine outpatient care<sup>12</sup>.  
28 356 Interestingly, this has not necessarily been the case with other more objective diagnostic tools, with  
29 357 examples of rapid diagnostic malaria tests leading to provider-caregiver tensions around treatments  
30 358<sup>24 25</sup>.

31  
32  
33  
34  
35  
36  
37  
38  
39 359 This study was potentially subject to social-desirability bias, with healthcare workers expressing  
40 360 opinions which they thought the facilitators wanted to hear. The purpose of the study was explained  
41 361 to the participants during the consent process, and was highlighted as an opportunity for them to  
42 362 contribute to the design of a revised paediatric oximeter and probe. In addition, the groups in some  
43 363 cases were mixed in terms of gender and job titles, possibly influencing participant's confidence in  
44 364 expressing their views and experiences. To mitigate these potential biases, the facilitators  
45 365 encouraged the all participants to contribute to the discussions and to be critical throughout. Both  
46 366 positive and negative views were given in both Malawi and Bangladesh, and by different types of  
47 367 HCPs, therefore we do not feel these biases detract from our findings. Finally, we were limited by  
48 368 the number of groups we conducted; additional groups or a different sampling approach may have

1  
2  
3 369 led to alternative perspectives being included, as the number was not driven by saturation.  
4 370 Therefore the conclusions we draw need to be interpreted accordingly.  
5  
6  
7 371 Overall pulse oximeters were valued by the HCPs we sampled for this study, despite challenges with  
8 372 charging, maintenance and speed of achieving accurate readings in moving or smaller children. This  
9  
10 373 implies that making improvements to currently available oximeters and probes could further  
11 374 facilitate successful implementation of this technology at the community through to the hospital  
12  
13 375 level for routine paediatric care in these two settings. Based on these providers varied experiences,  
14 376 we recommend that efforts to re-design a pulse oximeter for paediatric spot-checks focus on  
15  
16 377 improvements to battery durability, better fit for smaller digits and the speed at which readings are  
17  
18 378 obtained; these were all important challenges which did not necessarily have local solutions  
19  
20 379 presented. More substantive design changes could focus on alternative power and charging systems  
21 380 (e.g. solar charging) and '3-in-1' devices which include respiratory rate and temperature  
22  
23 381 measurements.  
24  
25  
26  
27  
28  
29  
30  
31  
32  
33  
34  
35  
36  
37  
38  
39  
40  
41  
42  
43  
44  
45  
46  
47  
48  
49  
50  
51  
52  
53  
54  
55  
56  
57  
58  
59  
60

**382 Acknowledgments**

383 We would like to thank all those healthcare providers who took part in the focus group discussions  
384 for their time. We would like to acknowledge other members of the study team: Katie Fernandez  
385 (Lifebox); Charles Makwenda and Tambosi Phiri (Parent and Child Health Initiative); Tim Colbourn  
386 (University College London); Mike Bernstein (Physio Monitor); and Nazma Begum, Arun Dutta Roy  
387 and Abu Abdullah Mohammad Hanif (Johns Hopkins University-Bangladesh).

388

**389 Funding**

390 This study was funded by the Bill & Melinda Gates Foundation (grant number: OPP1133291).

391

**392 Conflict of Interest**

393 Authors declare no conflicts of interest.

394

**395 Author contributions**

396 The qualitative study was designed and topic guides developed by IW<sub>i</sub>, IW<sub>a</sub>, CK and EDM, and the  
397 field manual written by CK. Oversight of the study was conducted by CK, BN and BZ in Malawi and  
398 EDM, AB and MI in Bangladesh. In Malawi, BZ and EK arranged, conducted, transcribed and  
399 translated the FGDs. In Bangladesh SA and MI arranged and conducted the FGDs. The data was  
400 coded and analysed by CK. The manuscript was written by CK, with considerable input from EDM.  
401 IW<sub>i</sub>, IW<sub>a</sub>, EDM, BZ, EK, SA, MI, NB, AB and BN read, commented and approved the manuscript.

402

**403 Data Sharing Statement**

404 Anonymised transcripts can be shared, following the signing of a data sharing agreement, subject to  
405 approval from the relevant National ethics committees. For further information please contact Dr.  
406 Carina King: c.king@ucl.ac.uk.

407 **References**

- 408 1. Sazawal S, Black RE, Pneumonia Case Management Trials G. Effect of pneumonia case  
409 management on mortality in neonates, infants, and preschool children: a meta-analysis of  
410 community-based trials. *Lancet Infect Dis* 2003;**3**(9):547-56.
- 411 2. Niessen LW, ten Hove A, Hilderink H, et al. Comparative impact assessment of child pneumonia  
412 interventions. *Bull World Health Organ* 2009;**87**(6):472-80.
- 413 3. Walker CL, Rudan I, Liu L, et al. Global burden of childhood pneumonia and diarrhoea. *Lancet*  
414 2013;**381**(9875):1405-16.
- 415 4. Organisation WH. *Oxygen therapy for children: a manual for health workers*. Geneva: WHO, 2016.
- 416 5. . WHO Recommendations on the Management of Diarrhoea and Pneumonia in HIV-Infected  
417 Infants and Children: Integrated Management of Childhood Illness (IMCI). Geneva, 2010.
- 418 6. Orimadegun A, Ogunbosi B, Orimadegun B. Hypoxemia predicts death from severe falciparum  
419 malaria among children under 5 years of age in Nigeria: the need for pulse oximetry in case  
420 management. *Afr Health Sci* 2014;**14**(2):397-407.
- 421 7. Chhibber AV, Hill PC, Jafali J, et al. Child Mortality after Discharge from a Health Facility following  
422 Suspected Pneumonia, Meningitis or Septicaemia in Rural Gambia: A Cohort Study. *Plos One*  
423 2015;**10**(9):e0137095.
- 424 8. Hooli S, Colbourn T, Lufesi N, et al. Predicting Hospitalised Paediatric Pneumonia Mortality Risk:  
425 An External Validation of RISC and mRISC, and Local Tool Development (RISC-Malawi) from  
426 Malawi. *Plos One* 2016;**11**(12):e0168126.
- 427 9. Wandeler G, Pauchard JY, Zangger E, et al. Which clinical signs predict hypoxaemia in young  
428 Senegalese children with acute lower respiratory tract disease? *Paediatrics and International*  
429 *Child Health* 2015;**35**(1):65-68.
- 430 10. Basnet S, Adhikari RK, Gurung CK. Hypoxemia in children with pneumonia and its clinical  
431 predictors. *The Indian Journal of Pediatrics* 2006;**73**(9):777-81.
- 432 11. Lodha R, Bhadauria PS, Kuttikat AV, et al. Can Clinical Symptoms or Signs Accurately Predict  
433 Hypoxemia in Children with Acute Lower Respiratory Tract Infections? *Indian Pediatr*  
434 2003;**41**:129-35.
- 435 12. McCollum ED, King C, Deula R, et al. Pulse oximetry for children with pneumonia treated as  
436 outpatients in rural Malawi. *Bull World Health Organ* 2016;**94**:893-902.
- 437 13. Duke T, Subhi R, Peel D, et al. Pulse oximetry: technology to reduce child mortality in developing  
438 countries. *Ann Trop Paediatr* 2009;**29**(3):165-75.

- 1  
2  
3 439 14. Emdin CA, Mir F, Sultana S, et al. Utility and feasibility of integrating pulse oximetry into the  
4 440 routine assessment of young infants at primary care clinics in Karachi, Pakistan: a cross-  
5 441 sectional study. *BMC Pediatrics* 2015;**15**(1):141.  
6  
7 442 15. King EM, Lieu C, Kasasa A, et al. Pulse Oximetry as a Screening Tool to Detect Hypoxia Associated  
8 443 with Early-onset Sepsis in Asymptomatic Newborns: A Feasibility Study in a Low-income  
9 444 Country. *British Journal of Medicine & Medical Research* 2014;**4**(5):1115-28.  
10  
11 445 16. Ginsburg AS, Izadnegahdar R, Klugman KP. World Pneumonia Day 2016: pulse oximetry and  
12 446 oxygen. *The Lancet Global Health* 2016;**4**(12):e893-e94.  
13  
14 447 17. Ginsburg AS, Van Cleve WC, Thompson MI, et al. Oxygen and pulse oximetry in childhood  
15 448 pneumonia: a survey of healthcare providers in resource-limited settings. *J Trop Pediatr*  
16 449 2012;**58**(5):389-93.  
17  
18 450 18. Spence H, Baker K, Wharton-Smith A, et al. Childhood pneumonia diagnostics: community health  
19 451 workers' and national stakeholders' differing perspectives of new and existing aids. *Glob*  
20 452 *Health Action* 2017;**10**(1):1290340.  
21  
22 453 19. Nsona H, Mtimuni A, Daelmans B, et al. Scaling up Integrated Community Case Management of  
23 454 Childhood Illness: Update from Malawi. *Am J Trop Med Hyg* 2012;**87**(Suppl 5):54-60.  
24  
25 455 20. Malawi Go. Integrated Management of Childhood Illness - Caring for Newborns and Children in  
26 456 the Community: Manual for Health Surveillance Assistants. In: Health Mo, ed. Lilongwe,  
27 457 Malawi, 2008.  
28  
29 458 21. Gale NK, Heath G, Cameron E, et al. Using the framework method for the analysis of qualitative  
30 459 data in multi-disciplinary health research. *BMC Medical Research Methodology*  
31 460 2013;**13**(1):117.  
32  
33 461 22. Ritchie J, Spencer L. Qualitative data analysis for applied policy research. *The qualitative*  
34 462 *researcher's companion* 2002;**573**:305-29.  
35  
36 463 23. McCollum ED, King C, Hammitt LL, et al. Reduction of childhood pneumonia mortality in the  
37 464 Sustainable Development era. *Lancet Respir Med* 2016;**4**(12):932-33.  
38  
39 465 24. Ansah EK, Reynolds J, Akanpigbiam S, et al. "Even if the test result is negative, they should be  
40 466 able to tell us what is wrong with us": a qualitative study of patient expectations of rapid  
41 467 diagnostic tests for malaria. *Malaria Journal* 2013;**12**(1):258.  
42  
43 468 25. Hutchinson E, Reyburn H, Hamlyn E, et al. Bringing the state into the clinic? Incorporating the  
44 469 rapid diagnostic test for malaria into routine practice in Tanzanian primary healthcare  
45 470 facilities. *Glob Public Health* 2015:1-15.  
46  
47  
48  
49  
50  
51  
52  
53  
54 471



**Table 1:** Summary of the FGD participants and their work experience

|                               | Community level                                              | Health centre or Upazila Health Complex         | Hospital                                                                                                                                             |
|-------------------------------|--------------------------------------------------------------|-------------------------------------------------|------------------------------------------------------------------------------------------------------------------------------------------------------|
| <b>BANGLADESH</b>             |                                                              |                                                 |                                                                                                                                                      |
| Total participants            | 8                                                            | 7                                               | 8                                                                                                                                                    |
| Job titles (number)           | Community healthcare worker (8)                              | Physician (4)<br>Medical officer (3)            | Senior staff nurse (1)<br>Associate professor (2)<br>ICU staff (1)<br>Anaesthesiologist (1)<br>Assistant registrar (1)<br>Intern medical officer (1) |
| Work experience (mean, range) | 1.7 years (0.6 – 4)                                          | 2.3 years (1 – 6)                               | 14.7 years (0.5 – 32)                                                                                                                                |
| <b>MALAWI</b>                 |                                                              |                                                 |                                                                                                                                                      |
| Total participants            | 9                                                            | 8                                               | 9                                                                                                                                                    |
| Job titles                    | Community healthcare worker (8)<br>Vital signs assistant (1) | Medical assistant (7)<br>Medical technician (1) | Clinical officer (3)<br>Nurse midwife (3)<br>Medical assistant (3)                                                                                   |
| Years' work experience (mean) | 10.6 years (5 – 20)                                          | 8.3 years (3 – 23)                              | 8.1 years (4 – 13)                                                                                                                                   |

472

473

474 **Panel 1:** Suggestions of desirable features or improvements given by healthcare providers

| <b>Challenge:</b>            | <b>Design suggestion:</b>                                                                                                                                                                                                              |
|------------------------------|----------------------------------------------------------------------------------------------------------------------------------------------------------------------------------------------------------------------------------------|
| Probe fit                    | Supplied with multiple sizes of probes for different ages<br>A single cable with multiple probes that can be changed (e.g. clipped into the cable)<br>Softer material for a more comfortable fit                                       |
| Probe placement              | Probe made of transparent material so sensor placement on the nail can be seen                                                                                                                                                         |
| Cleaning                     | Alcohol wipes provided for easier cleaning<br>Different colour probe to make it easier to see the dirt, but does not look dirty quickly                                                                                                |
| Power                        | Solar powered charger with rechargeable batteries<br>Back-up power bank<br>Supplied with a spare battery                                                                                                                               |
| Agitated children            | Toy feature in the device to distract the child<br>Improve the sensitivity of the device to be quicker<br>Improve the sensitivity of the device to tolerate movement                                                                   |
| Integrated spot-check device | Store results in a memory that can later be accessed<br>Static oxygen saturation result display<br>'3-in-1' device which includes temperature and respiratory rate measurements as well<br>Shorter cable length for easier portability |

475

1  
2  
3 476 **Figure legends:**  
4

5 477 **Figure 1:** Pulse oximeters and probe used by healthcare providers in routine clinical care  
6

7 478 a. Lifebox® oximeter and adult universal clip probe used in Malawi (accessed on 1<sup>st</sup> July 2017  
8 from: [www.lifebox.org](http://www.lifebox.org))  
9 479

10 480 b. Masimo Rad5® oximeter and LNCS® Y-I Multisite wrap probe used in Bangladesh (accessed on  
11 1<sup>st</sup> July 2017 from: [www.pacificmedicalsupply.com](http://www.pacificmedicalsupply.com))  
12 481  
13  
14  
15  
16  
17  
18  
19  
20  
21  
22  
23  
24  
25  
26  
27  
28  
29  
30  
31  
32  
33  
34  
35  
36  
37  
38  
39  
40  
41  
42  
43  
44  
45  
46  
47  
48  
49  
50  
51  
52  
53  
54  
55  
56  
57  
58  
59  
60

1  
2  
3  
4  
5  
6  
7  
8  
9  
10  
11  
12  
13  
14  
15  
16  
17  
18  
19  
20  
21  
22  
23  
24  
25  
26  
27  
28  
29  
30  
31  
32  
33  
34  
35  
36  
37  
38  
39  
40  
41  
42  
43  
44  
45  
46  
47  
48  
49  
50  
51  
52  
53  
54  
55  
56  
57  
58  
59  
60

a.

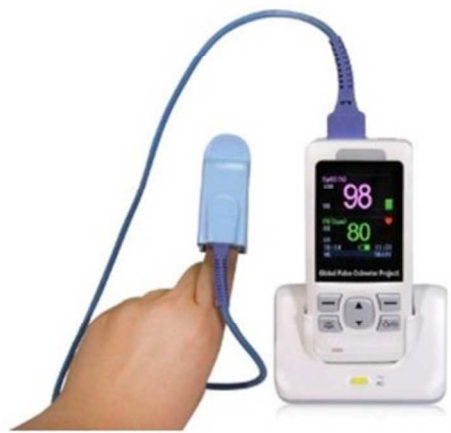

b.

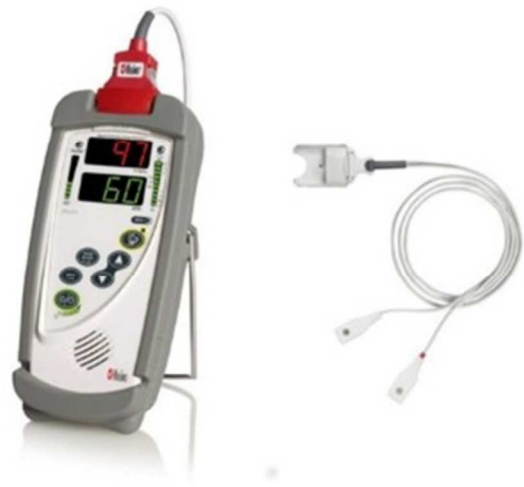

64x97mm (300 x 300 DPI)

## Web Appendix 1 – Topic Guide

- What is your experience of using pulse oximeters in children?
- What have been the main issues you've encountered when using pulse oximeters?
- What have been the things you like most about using the pulse oximeters?
- What type of probes have you used? Have any been better than others? Why?
- Thinking about the probes, we would like to hear your feedback about some aspects of using them: ease of putting and keeping the probe on the child, durability, ease of taking a reading, ease of keeping it clean and storage
- Thinking about the oximeter, we would like to hear your feedback about some aspects of using them: ease of reading the display, durability, battery life and charging, time taken to get a reading
- What things would make the probe and pulse oximeter easier to use?
- What things would make the probe and pulse oximeter harder to use?

**Appendix 2:** Summary of pulse oximeter probes presented during focus group discussions with healthcare providers

| Probe type      | Figure                                                                              | Product code     |
|-----------------|-------------------------------------------------------------------------------------|------------------|
| Neonatal wrap   |    | Acare ASYNR-D1   |
| Adult clip      |    | Acare ASANR-D1   |
| Paediatric clip |   | Acare ASPNR-D1   |
| Ear clip        |  | Nellcor U401-2HL |
| Adult boot      |  | Acare ASSNR-D1   |
| Paediatric boot |  | Nellcor U401-2EL |

## COREQ Checklist

| No                                      | Item                                     | Guide questions/description                                                                                                                      | Page / evidence                    |
|-----------------------------------------|------------------------------------------|--------------------------------------------------------------------------------------------------------------------------------------------------|------------------------------------|
| Domain 1: Research team and reflexivity |                                          |                                                                                                                                                  |                                    |
| Personal Characteristics                |                                          |                                                                                                                                                  |                                    |
| 1.                                      | Interviewer/<br>facilitator              | Which author/s conducted the interview or focus group?                                                                                           | Pg 15, Author contributions        |
| 2.                                      | Credentials                              | What were the researcher's credentials? <i>E.g. PhD, MD</i>                                                                                      | A mix of diploma, BSc, MSc and PhD |
| 3.                                      | Occupation                               | What was their occupation at the time of the study?                                                                                              | Pg 6, Methods: procedure           |
| 4.                                      | Gender                                   | Was the researcher male or female?                                                                                                               | Both                               |
| 5.                                      | Experience and training                  | What experience or training did the researcher have?                                                                                             | Pg 6, 'Methods: Procedure'         |
| Relationship with participants          |                                          |                                                                                                                                                  |                                    |
| 6.                                      | Relationship established                 | Was a relationship established prior to study commencement?                                                                                      | No                                 |
| 7.                                      | Participant knowledge of the interviewer | What did the participants know about the researcher? <i>e.g. personal goals, reasons for doing the research</i>                                  | Pg 15, Discussion                  |
| 8.                                      | Interviewer characteristics              | What characteristics were reported about the interviewer/facilitator? <i>e.g. Bias, assumptions, reasons and interests in the research topic</i> | Pg 15, Discussion                  |
| Domain 2: study design                  |                                          |                                                                                                                                                  |                                    |
| Theoretical framework                   |                                          |                                                                                                                                                  |                                    |

| No                    | Item                                  | Guide questions/description                                                                                                                                     | Page / evidence           |
|-----------------------|---------------------------------------|-----------------------------------------------------------------------------------------------------------------------------------------------------------------|---------------------------|
| 9.                    | Methodological orientation and Theory | What methodological orientation was stated to underpin the study? <i>e.g. grounded theory, discourse analysis, ethnography, phenomenology, content analysis</i> | Pg 7, Methods: Analysis   |
| Participant selection |                                       |                                                                                                                                                                 |                           |
| 10.                   | Sampling                              | How were participants selected? <i>e.g. purposive, convenience, consecutive, snowball</i>                                                                       | Pg 6, Methods: Sampling   |
| 11.                   | Method of approach                    | How were participants approached? <i>e.g. face-to-face, telephone, mail, email</i>                                                                              | Pg 6, Sampling            |
| 12.                   | Sample size                           | How many participants were in the study?                                                                                                                        | Pg 7, Results and Table 1 |
| 13.                   | Non-participation                     | How many people refused to participate or dropped out? Reasons?                                                                                                 | Pg 6, Sampling            |
| Setting               |                                       |                                                                                                                                                                 |                           |
| 14.                   | Setting of data collection            | Where was the data collected? <i>e.g. home, clinic, workplace</i>                                                                                               | Pg 6, Sampling            |
| 15.                   | Presence of non-participants          | Was anyone else present besides the participants and researchers?                                                                                               | Pg 6, Methods: Procedure  |
| 16.                   | Description of sample                 | What are the important characteristics of the sample? <i>e.g. demographic data, date</i>                                                                        | Table 1                   |
| Data collection       |                                       |                                                                                                                                                                 |                           |
| 17.                   | Interview guide                       | Were questions, prompts, guides provided by the authors? Was it pilot tested?                                                                                   | Appendix 1                |
| 18.                   | Repeat interviews                     | Were repeat interviews carried out? If yes, how many?                                                                                                           | Not applicable            |



| No                              | Item                           | Guide questions/description                                              | Page / evidence                                          |
|---------------------------------|--------------------------------|--------------------------------------------------------------------------|----------------------------------------------------------|
| 19.                             | Audio/visual recording         | Did the research use audio or visual recording to collect the data?      | Pg 7, Methods: Procedure                                 |
| 20.                             | Field notes                    | Were field notes made during and/or after the interview or focus group?  | Pg 7, Methods: Procedure                                 |
| 21.                             | Duration                       | What was the duration of the interviews or focus group?                  | Between 1 and 2 hours                                    |
| 22.                             | Data saturation                | Was data saturation discussed?                                           | Pg 14, Discussion                                        |
| 23.                             | Transcripts returned           | Were transcripts returned to participants for comment and/or correction? | This was not possible due to language potential barriers |
| Domain 3: analysis and findings |                                |                                                                          |                                                          |
| Data analysis                   |                                |                                                                          |                                                          |
| 24.                             | Number of data coders          | How many data coders coded the data?                                     | Pg 7, Methods: Analysis                                  |
| 25.                             | Description of the coding tree | Did authors provide a description of the coding tree?                    | Pg 7, Methods: Analysis                                  |
| 26.                             | Derivation of themes           | Were themes identified in advance or derived from the data?              | Pg 7, Results                                            |
| 27.                             | Software                       | What software, if applicable, was used to manage the data?               | Pg 7, Methods: Analysis                                  |
| 28.                             | Participant checking           | Did participants provide feedback on the findings?                       | No, but discussed with local researchers (pg 7)          |

| No        | Item                         | Guide questions/description                                                                                                              | Page / evidence                        |
|-----------|------------------------------|------------------------------------------------------------------------------------------------------------------------------------------|----------------------------------------|
| Reporting |                              |                                                                                                                                          |                                        |
| 29.       | Quotations presented         | Were participant quotations presented to illustrate the themes / findings? Was each quotation identified? e.g. <i>participant number</i> | Throughout results section (pg 7 – 12) |
| 30.       | Data and findings consistent | Was there consistency between the data presented and the findings?                                                                       | Throughout results section (pg 7 – 12) |
| 31.       | Clarity of major themes      | Were major themes clearly presented in the findings?                                                                                     | Pg 7, Results                          |
| 32.       | Clarity of minor themes      | Is there a description of diverse cases or discussion of minor themes?                                                                   | Throughout results section (pg 7 – 12) |

# BMJ Open

## Opportunities and barriers in paediatric pulse oximetry for pneumonia in low-resource clinical settings: a qualitative evaluation from Malawi and Bangladesh

|                                 |                                                                                                                                                                                                                                                                                                                                                                                                                                                                                                                                                                                                                                                                                                                                                                                                                                                                                                                                                                                                                                                                    |
|---------------------------------|--------------------------------------------------------------------------------------------------------------------------------------------------------------------------------------------------------------------------------------------------------------------------------------------------------------------------------------------------------------------------------------------------------------------------------------------------------------------------------------------------------------------------------------------------------------------------------------------------------------------------------------------------------------------------------------------------------------------------------------------------------------------------------------------------------------------------------------------------------------------------------------------------------------------------------------------------------------------------------------------------------------------------------------------------------------------|
| Journal:                        | <i>BMJ Open</i>                                                                                                                                                                                                                                                                                                                                                                                                                                                                                                                                                                                                                                                                                                                                                                                                                                                                                                                                                                                                                                                    |
| Manuscript ID                   | bmjopen-2017-019177.R2                                                                                                                                                                                                                                                                                                                                                                                                                                                                                                                                                                                                                                                                                                                                                                                                                                                                                                                                                                                                                                             |
| Article Type:                   | Research                                                                                                                                                                                                                                                                                                                                                                                                                                                                                                                                                                                                                                                                                                                                                                                                                                                                                                                                                                                                                                                           |
| Date Submitted by the Author:   | 24-Nov-2017                                                                                                                                                                                                                                                                                                                                                                                                                                                                                                                                                                                                                                                                                                                                                                                                                                                                                                                                                                                                                                                        |
| Complete List of Authors:       | King, C.; University College London Institute for Global Health, Boyd, Nicholas; Great Ormond Street Hospital For Children NHS Trust, UCL Institute of Child Health<br>Walker, Isabeau; Great Ormond Street Hospital For Children NHS Trust, UCL Institute of Child Health<br>Zadutsa, Beatiwel; Parent and Child Health Initiative<br>Baqui, Abdullah; Johns Hopkins University Bloomberg School of Public Health, International Center for Maternal and Newborn Health<br>Ahmed, Salahuddin; Johns Hopkins University Bloomberg School of Public Health, International Center for Maternal and Newborn Health<br>Islam, Mazharul; Shahjalal University of Science and Technology, Department of Anthropology<br>Kainja, Esther; Parent and Child Health Initiative<br>Nambiar, Bejoy; Institute for Global Health<br>Wilson, Iain; Lifebox Foundation<br>McCollum, Eric ; Johns Hopkins School of Medicine, Eudowood Division of Paediatric Respiratory Diseases; Johns Hopkins University Bloomberg School of Public Health, Department of International Health |
| <b>Primary Subject Heading</b>: | Global health                                                                                                                                                                                                                                                                                                                                                                                                                                                                                                                                                                                                                                                                                                                                                                                                                                                                                                                                                                                                                                                      |
| Secondary Subject Heading:      | Paediatrics, Respiratory medicine, Qualitative research, Diagnostics                                                                                                                                                                                                                                                                                                                                                                                                                                                                                                                                                                                                                                                                                                                                                                                                                                                                                                                                                                                               |
| Keywords:                       | Pulse oximeter, Oxygen saturation, Pneumonia, Children, Sub-Saharan Africa, South Asia                                                                                                                                                                                                                                                                                                                                                                                                                                                                                                                                                                                                                                                                                                                                                                                                                                                                                                                                                                             |
|                                 |                                                                                                                                                                                                                                                                                                                                                                                                                                                                                                                                                                                                                                                                                                                                                                                                                                                                                                                                                                                                                                                                    |

SCHOLARONE™  
Manuscripts

1  
2  
3 1 **Title:** Opportunities and barriers in paediatric pulse oximetry for pneumonia in low-resource clinical  
4 settings: a qualitative evaluation from Malawi and Bangladesh  
5  
6

7 3  
8  
9 4 **Authors:** Carina King<sup>1\*</sup>, Nicholas Boyd<sup>2</sup>, Isabeau Walker<sup>2</sup>, Beatiwel Zadutsa<sup>3</sup>, Abdullah H. Baqui<sup>4</sup>,  
10 Salahuddin Ahmed<sup>4</sup>, Mazharul Islam<sup>5</sup>, Esther Kainja<sup>3</sup>, Bejoy Nambiar<sup>1</sup>, Iain Wilson<sup>6</sup>, Eric D.  
11 McCollum<sup>7,8</sup>  
12  
13

14 7  
15  
16  
17 8 **Affiliations:**  
18

- 19 9 1. Institute for Global Health, University College London, London, UK  
20 10 2. Great Ormond Street Hospital NHS Foundation Trust, UCL Institute of Child Health, London,  
21 UK  
22 11 3. Parent and Child Health Initiative, Lilongwe, Malawi  
23 12 4. International Center for Maternal and Newborn Health, Johns Hopkins Bloomberg School of  
24 Public Health, Baltimore, USA  
25 13 5. Department of Anthropology, Shahjalal University of Science and Technology, Sylhet,  
26 Bangladesh  
27 14 6. Lifebox Foundation, London, UK  
28 15 7. Eudowood Division of Pediatric Respiratory Diseases, Johns Hopkins School of Medicine,  
29 Baltimore, USA  
30 16 8. Department of International Health, Johns Hopkins Bloomberg School of Public Health,  
31 Baltimore, USA  
32 17  
33 18  
34 19  
35 20  
36 21  
37 22  
38  
39  
40  
41

42 23 **\*Corresponding author:**  
43

44 24 Dr. Carina King; Email: [c.king@ucl.ac.uk](mailto:c.king@ucl.ac.uk); Address: Institute for Global Health, 30 Guilford Street,  
45 London, WC1N 1EH; Telephone: +44 (0) 2076797619  
46  
47  
48  
49 26

50  
51 27 **Keywords:** Pulse oximeter, oxygen saturation, pneumonia, sub-Saharan Africa, South Asia, children  
52

53 28  
54  
55 29 **Word Count:** 4,111  
56  
57  
58  
59  
60

1  
2  
3 **30 Abstract**  
4

5 *31 Objective:* To gain an understanding of what challenges pulse oximetry for paediatric pneumonia  
6 management poses, how it has changed service provision and what would improve this device for  
7 use across paediatric clinical settings in low-income countries.  
8  
9

10 *34 Design:* Focus group discussions (FGDs), with purposive sampling and thematic analysis using a  
11 framework approach.  
12  
13

14 *36 Setting:* Community, front line outpatient and hospital outpatient and inpatient settings in Malawi  
15 and Bangladesh, which provide paediatric pneumonia care.  
16  
17

18 *38 Participants:* Healthcare providers (HCPs) from Malawi and Bangladesh who had received training in  
19 pulse oximetry and had been using oximeters in routine paediatric care, including community  
20 healthcare workers, non-physician clinicians or medical assistants, and hospital-based nurses and  
21 doctors.  
22  
23  
24

25 *42 Results:* We conducted six FGDs, with 23 participants from Bangladesh and 26 from Malawi. We  
26 identified five emergent themes: trust; value; user-related experience; sustainability; and design.  
27 HCPs discussed the confidence gained through using oximeters, resulting in improved trust from  
28 caregivers and valuing the device; although there were conflicts between the weight given to clinical  
29 judgement versus oximeter results. HCPs reported the ease of using oximeters, but identified  
30 movement and physically smaller children as measurement challenges. Challenges in sustainability  
31 related to battery durability and replacement parts were reported, however many HCPs had used  
32 the same device longer than four years demonstrating robustness within these settings. Desirable  
33 features included back-up power banks and integrated respiratory rate and thermometer capability.  
34  
35  
36  
37  
38  
39

40 *51 Conclusions:* Pulse oximetry was generally deemed valuable by HCPs for use as a spot-check device  
41 in a range of paediatric low-income clinical settings. Areas highlighted as challenges by HCPs, and  
42 therefore opportunities for re-design, included battery charging and durability, probe fit and  
43 sensitivity in paediatric populations.  
44  
45  
46  
47  
48  
49  
50  
51  
52  
53  
54

1  
2  
3 55 **Strengths and Limitations**  
4

- 5 56 • This is the first study to report on end-user perceptions of opportunities, challenges and  
6 57 desirable design features of pulse oximeters used for paediatric pneumonia management in  
7 58 low-resource settings, including community and outpatient providers.  
8  
9 59 • A key strength was the wide range of healthcare provider perspectives included, from  
10 60 community to referral hospital settings in South Asia and sub-Saharan Africa.  
11  
12 61 • The study was limited to participant's experience of using specific pulse oximeters and  
13 62 therefore may lack generalizability to other paediatric pulse oximeters not used in these  
14 63 settings.  
15  
16 64

## 65 Introduction

66 Several interventions, such as Pneumococcal conjugate vaccine (PCV) and standardised guidelines  
67 for diagnosis and treatment, have led to reductions in pneumonia morbidity and mortality over the  
68 last twenty years <sup>1,2</sup>. However, in spite of these gains, pneumonia remains the leading cause of  
69 infectious mortality amongst children globally, with the vast majority of the burden falling in sub-  
70 Saharan Africa and south Asia <sup>3</sup>. To accelerate reductions in pneumonia mortality, further  
71 refinement of diagnosis and treatment pathways are needed, including correct referral and access to  
72 oxygen treatment <sup>4</sup>.

73 Pulse oximetry non-invasively measures peripheral arterial oxyhemoglobin saturation (SpO<sub>2</sub>).  
74 Hypoxemia (defined as an SpO<sub>2</sub> <90%) is included in the World Health Organization (WHO)  
75 guidelines as a pneumonia danger sign <sup>5</sup>, and is associated with increased mortality from  
76 pneumonia, as well as other illnesses like malaria <sup>6-8</sup>. Recent evidence from Malawi has also  
77 indicated that a SpO<sub>2</sub> 90-92% is predictive of mortality amongst children hospitalized with  
78 pneumonia <sup>8</sup>.

79 While some studies have attempted to predict hypoxemia in children with pneumonia using a  
80 combination of clinical signs, there has been mixed success <sup>9-11</sup>. Clinical signs alone fail to identify a  
81 proportion of hypoxemic children based on the current WHO guidelines, which results in a missed  
82 opportunity for referral and appropriate treatment <sup>12,13</sup>. In addition, the subjectivity of clinical signs  
83 can lead to variation in care – especially among community healthcare workers (CHWs), who often  
84 lack ongoing supervision.

85 Pulse oximeters have been successfully used in low-resource paediatric settings, but are yet to be  
86 widely adopted, particularly during outpatient care <sup>14,15</sup>. The Ethiopian Ministry of Health has  
87 demonstrated leadership in this area, setting up an initiative in 2016 to ensure oximetry and oxygen  
88 therapy are available nationally across the healthcare system <sup>16</sup>. However, Ethiopia is an exception,  
89 with implementation of oximetry in other developing countries continuing to be slow.  
90 Implementation barriers cited include cost, issues with training and supervision and the lack of  
91 appropriately designed, robust oximeters and universal paediatric probes, although there are  
92 several initiatives to develop devices for low-income settings (e.g. Lifebox<sup>®</sup> and the Phone  
93 Oximeter<sup>™</sup>)<sup>17-19</sup>.

94 In order to better understand current barriers to use of pulse oximetry by healthcare providers  
95 (HCPs) in a range of healthcare settings, and explore opportunities that this technology provides,  
96 input from end-users is needed <sup>20</sup>. With the ultimate goal of designing a universal paediatric probe

1  
2  
3 97 for all levels of healthcare services in resource-poor settings, we aimed to gain an understanding of  
4 98 the challenges of pulse oximetry, how its use has changed service provision and how current devices  
5 99 could be improved for these settings. This end-user perspective is currently limited in the literature  
6  
7 100 and is essential to ensure investment in pulse oximetry is sustainable and effective.  
8  
9

10 101

## 102 **Methods**

103 We conducted a qualitative study with HCPs from different levels of the healthcare system in from  
104 one site in Malawi (Mchinji district, central region) and one in Bangladesh (Sylhet district, northeast  
105 region) from May – July 2016, as part of a wider programme of work aiming to design a universal  
106 paediatric oximeter probe.

### 107 Setting:

108 In Malawi there are three levels of government provided healthcare: CHWs (locally known as Health  
109 Surveillance Assistants), health centres and district hospitals. CHWs conduct weekly or bi-weekly  
110 village clinics and home visits providing basic integrated community case management (iCCM) for  
111 paediatric infections<sup>21,22</sup>. Health centres are outpatient facilities run by nurses, clinical officers or  
112 medical assistants, and District Hospitals have inpatient facilities with capacity for oxygen treatment.  
113 In Mchinji, pulse oximetry was successfully introduced into all three healthcare settings in 2012 as  
114 part of a PCV research project, using the Acare Technology AH-MX manufactured Lifebox® oximeter  
115 and universal adult clip probe (Figure 1a)<sup>12</sup>.

116 In Bangladesh, the study was conducted at Projahnmo, a research consortium comprised of Johns  
117 Hopkins University and several local non-governmental organizations in partnership with the  
118 Bangladesh Ministry of Family Health and Welfare. Current Projahnmo activities are integrated  
119 within three government-operated sub-district hospitals, called Upazila Health Complexes (UHCs),  
120 and the referral government hospital in Sylhet city (Osmani Medical College), all of which are staffed  
121 by physicians and nurses. The UHCs operate outpatient clinics for children under five and provide  
122 basic inpatient paediatric care, including oxygen. The majority of government provided inpatient  
123 care is provided at Osmani Medical College. Female CHWs employed by Projahnmo conduct  
124 bimonthly household surveillance, with a subset of CHWs providing weekly surveillance as a part of a  
125 PCV effectiveness study. Projahnmo CHWs conduct basic clinical assessments and refer ill children  
126 for care at the UHCs; they do not administer medicines themselves. Since 2015, a National Institutes  
127 of Health-funded study (K01TW009988) trained and supplied all Projahnmo clinical staff in



1  
2  
3 128 Bangladesh, including CHWs, with pulse oximeters to screen children for hypoxemia, using the  
4 129 Masimo Rad5® oximeter and the LNCS® Y-I Multisite wrap probe (Figure 1b).  
5  
6  
7 130 In Malawi, CHWs individually own the oximeters, and facilities were given a device for each clinic or  
8 131 ward, while in Bangladesh, Projahnmo owns the oximeters and individual healthcare providers are  
9  
10 132 responsible for routine care and maintenance of the devices. Oximetry was not included in the  
11 133 Malawi paediatric guidelines, and Bangladesh did not have national paediatric pneumonia guidelines  
12  
13 134 at the time of the study.

14  
15 135 Design:

16  
17  
18 136 We conducted focus group discussions (FGDs). We planned three FGDs in each country, aiming to  
19 137 recruit between 6 and 10 people for each FGD (up to 60 participants in total). This number of groups  
20 138 was agreed upon before data collection began, driven by practical considerations given few  
21 139 healthcare workers in either setting have experience using pulse oximeters with children. The groups  
22 140 were planned to be CHWs, health centre or UHC staff, and referral hospital staff separately.  
23  
24 141 Conducting separate FGDs for the different types of healthcare workers was to allow context-specific  
25 142 discussions and encourage participants with varying training backgrounds to feel confident about  
26  
27 143 raising challenges relevant to their specific setting.

28  
29  
30  
31 144 Sampling:

32  
33 145 HCPs were purposefully sampled from sites where pulse oximetry had been introduced, and the  
34 146 participants had received some form of training or mentorship in oximetry. Participants were  
35 147 identified by local researchers (BZ in Malawi and SA in Bangladesh) to be a representative sample of  
36 148 HCPs from their setting (e.g. small and large health centres, inpatient wards and outpatient  
37 149 departments in the hospital), and contacted directly by phone. All HCPs contacted participated.  
38 150 Participants were reimbursed for their travel costs to the local healthcare facility and provided with  
39 151 refreshments.

40  
41  
42  
43  
44  
45 152 Procedure:

46  
47 153 FGDs were led by local researchers with experience in conducting qualitative research, with support  
48 154 from a facilitator with knowledge of pulse oximeters. The FGDs were divided into two sections, the  
49 155 first addressing the participants' personal experience with using pulse oximeters. The topic guide  
50 156 included: positive and negative experiences, and possible improvements and challenges (Web  
51 157 appendix 1). During the second part of the discussion, the participants were presented with different  
52 158 probe designs and given an opportunity to use them for an hour (Web appendix 2). Following this,

159 the discussion addressed positive and negative aspects of the different designs to encourage critical  
160 thinking of possible design solutions to the current limitations of a universal paediatric probe.

161 The FGDs were audio recorded and then transcribed, along with the facilitators notes. Questions  
162 were asked in a mix of English and local dialects depending on understanding and ease of expression  
163 (Chichewa, Bangla or Sylheti) and participants were told to answer in their preferred language.  
164 Responses were clarified by facilitators if there was an issue with language and understanding  
165 between participants. Recordings were transcribed and translated where necessary. Translations for  
166 Malawi were done by BZ and EK together until final transcripts were agreed, and by an independent  
167 professional service for Bangladesh.

#### 168 Analysis:

169 We analysed the data thematically using a framework approach, as an appropriate method for a  
170 multi-disciplinary team conducting health research<sup>23</sup>. This process involves five steps:  
171 familiarisation, identifying a thematic framework, indexing, mapping and interpretation<sup>24</sup>. The  
172 transcripts and notes from the FGDs were printed and coded on paper, with the coding matrix  
173 created in Microsoft Excel. CK and KF independently familiarised themselves and indexed the data,  
174 and the emergent themes were discussed until a consensus was reached on the mapping and  
175 interpretation of the data. This interpretation was shared with the local researchers (BZ and EK in  
176 Malawi; EDM and MI in Bangladesh) for further discussion until all were in agreement.

#### 177 Ethics:

178 Written informed consent was obtained from all FGD participants. This study was reviewed and  
179 approved by the University College London research ethics committee (8075/003), Johns Hopkins  
180 Medicine Institutional Review Board (IRB00047406), the Malawi National Health Sciences Research  
181 Committee (16/4/1570) and Bangladesh Medical Research Council (BMRC/NREC/2013-2016/1272).

182

#### 183 **Results**

184 We conducted six FGDs, with 23 participants from Bangladesh and 26 from Malawi (Table 1). We  
185 identified five emergent themes: trust; value; user-related experience; sustainability; and design.

#### 186 Trust

187 Trust emerged as a theme both in terms of how the HCPs interpret the oximetry results, and how  
188 caregivers interact with HCPs and the pulse oximeter. We found that all cadres of HCPs in both sites

1  
2  
3 189 had an awareness of the fallibility of the oximetry readings, specifically relating to lower SpO<sub>2</sub> values.  
4 190 For SpO<sub>2</sub> levels which were deemed abnormal, <90% up to <95% according to different participants,  
5 191 HCPs stated that they would often re-check the result before making a referral or treatment  
6 192 decision:

7  
8  
9  
10 193 *"if we see it is 89% we change the probe or change the finger" (Hospital, Bangladesh)*

11  
12 194 However, questioning the validity of these lower SpO<sub>2</sub> results in the context of a child's clinical  
13  
14 195 condition was only discussed by the HCPs who worked in the hospital setting. This difference in the  
15  
16 196 trust placed in the SpO<sub>2</sub> results by different types of HCPs suggests that more in-depth clinical  
17  
18 197 training and understanding of the technology may result in different clinical applications:

19 198 *"sometimes the pulse oximeter can give readings which you are not comfortable with according to*  
20 199 *the presentation of the child [...] most of the time when it happens like that, we just use our*  
21  
22 200 *judgement"* (Hospital, Malawi)

23  
24  
25 201 An outcome of using pulse oximeters for pneumonia diagnosis was a change in parental and  
26  
27 202 community understanding and perceptions of care, with HCPs discussing increased trust in their  
28  
29 203 referral and treatment decisions. This worked in two ways, firstly with the oximeter acting as a direct  
30  
31 204 feedback and education tool:

32 205 *"if the mother is able to read you can show the exact figure and she will accept the treatment of*  
33  
34 206 *oxygen, [before] it was very difficult to explain the role or the importance of the oxygen machine and*  
35  
36 207 *some mothers refused"* (Hospital, Malawi)

37  
38 208 Secondly, in Malawi HCPs projected that the oximeters had improved clinical care, and therefore  
39  
40 209 outcomes, which led caregivers to be more inclined to accept the referral or treatment being  
41  
42 210 recommended, especially in the case of oxygen:

43 211 *"[previously] in the village they were saying that when a child is put on the oxygen machine it*  
44  
45 212 *facilitates death, therefore it was making problems, but this time because children are put on oxygen*  
46  
47 213 *earlier they survive, it's because we knew the saturation"* (Health centre, Malawi)

48 214 Value

49  
50  
51 215 The theme of value relates to the inherent value of improved decision making, HCPs perceived self-  
52  
53 216 value (i.e. confidence) in their clinical work, and the physical value placed on maintaining a working  
54  
55 217 pulse oximeter. As pneumonia is classified using a range of non-specific and often subjective clinical  
56  
57 218 signs, HCPs discussed the positive addition of this more objective measure:

1  
2  
3 219 *"...by looking at this we can understand how much respiratory distress is in there. Of course this helps*  
4 220 *us a lot."* (Health Centre, Bangladesh)

5  
6  
7 221 In both sites HCPs from frontline settings (CHWs, health centres and UHCs) stated that the pulse  
8 222 oximeters had changed the way they work and given them confidence in making referral decisions.  
9  
10 223 Interestingly however, in the referral hospital setting in Bangladesh where staff training is higher,  
11 224 very little value was placed on the pulse oximeter for improving their clinical performance, with the  
12 225 ability to conduct chest x-rays, lung ultra-sound and their clinical judgement valued more highly:

13  
14  
15 226 *"...its sensitivity and specificity is very negligible to be taken as a diagnostic tool."* (Hospital,  
16 227 Bangladesh)

17  
18  
19 228 In Bangladesh the CHWs reported pride in using the oximeters. In Malawi, the CHWs placed a  
20 229 physical value on the oximeters and discussed the personal effort, such as paying out of pocket to  
21 230 travel commercial charging services, they put in to maintaining a working device:

22  
23  
24  
25 231 *"...we have been trying all that is humanly possible to take care of these things, but it only becomes a*  
26 232 *problem when it comes to the issue of charging."* (CHW, Malawi)

27  
28  
29 233 This was also reflected at the health centre, where not all facilities have electricity and one or two  
30 234 staff are responsible for assessing children. At the referral hospital however this was not discussed,  
31 235 with oximeters belonging to the ward, which has a more consistent power supply. Ward-based  
32 236 ownership was discussed as a challenge, suggesting individual ownership could result in improved  
33 237 care and maintenance as having a device in working order would not be dependent on the  
34 238 performance of others.

35  
36  
37  
38  
39 239 *"...some of the clinicians do not take care of them, so when the machine is not working it means the*  
40 240 *whole department is affected"* (Hospital, Malawi)

#### 41 42 43 241 User-related experience

44  
45 242 HCPs at all levels discussed their experiences of using pulse oximeters in children under 5-years,  
46 243 presenting challenges, their solutions and perceptions of usability. The time taken to get a  
47 244 measurement ranged widely, with CHWs in Bangladesh agreeing measurements took less than 1  
48 245 minute but in Malawi that it could take up to 20 minutes. The factors that increased the time taken  
49 246 to get a measurement were consistently cited as movement and physically smaller children, and in  
50 247 Malawi dirty toes making measurements difficult:

51  
52  
53  
54  
55 248 *"Getting readings from irritable babies is a bit tough and it takes time."* (Health centre, Bangladesh)

1  
2  
3 249 *"...using it on a child up to six months of age, sometimes it has been a problem because these*  
4 250 *children have got small fingers, so although we use toes sometimes they are also small and the child*  
5 251 *is afraid so they start crying. So we have got other things we can give a child to play with but it is a*  
6 252 *little bit of a problem, but at the end we get the results."* (CHW, Malawi)  
7  
8  
9

10 253 Solutions to these challenging children included asking caregivers to breastfeed, giving them a toy to  
11 254 distract them, and simply waiting. The term used frequently to describe challenging children was  
12 255 'fear', with the HCPs stating that children are afraid of having the measurements taken. This fear was  
13 256 associated with the sensors' red light which frightened children, the anticipation of pain, or just  
14 257 being an unknown. All of these could result in the child being agitated, crying and uncooperative.  
15 258 Despite these issues in small and agitated infants, the oximeters were considered easy to use:

16 259 *"...it's not complicated, it doesn't need complicated education for a healthcare worker to use, with a*  
17 260 *good explanation from a colleague or friend you are able to use it."* (Hospital, Malawi)  
18  
19

20 261 There was also the acknowledgement that time to reading was not as important as getting the  
21 262 correct measurement; for some respondents, the reason some measurements take longer is the  
22 263 desire to get a reliable reading. This included cleaning the child's digits or repositioning the probe:

23 264 *"...taking longer does not mean that one doesn't know the procedure, but sometime it's because you*  
24 265 *want to give the correct reading."* (CHW, Malawi)  
25  
26  
27  
28  
29

30 266 A key challenge reported by frontline HCPs in Malawi was around keeping the oximeter charged; this  
31 267 was not considered a significant challenge in Bangladesh. However, here they had issues with  
32 268 ensuring the oximeter remained dry and protected during rains and being fully waterproof was  
33 269 desirable. Depending on usage, battery life was reported as 1 week – 2 months.  
34  
35  
36  
37  
38  
39

#### 40 270 Sustainability

41 271 Sustainability was discussed in terms of the device's durability, and the need for continued  
42 272 professional development. Generally the pulse oximeters were thought of as robust and durable,  
43 273 with some of the HCPs having used their device for over four years without replacements. However,  
44 274 the battery was highlighted as the least durable part of the device, and there was a perception that  
45 275 when the battery was worn down the readings became less reliable.

46 276 *"There is a matter with the battery too, if the battery is not enough the reading takes a long time to*  
47 277 *appear. It sometimes gives false negative readings."* (Hospital, Bangladesh)  
48  
49  
50  
51  
52  
53  
54  
55  
56  
57  
58  
59

1  
2  
3 278 This related to the HCPs suggestion of having on-going maintenance support rather than wanting  
4 279 replacement devices. HCPs described the need for on-going training and support, but also expressed  
5 280 a desire for more in-depth education on how oximetry works which goes beyond the basic training  
6 281 to take a reliable measurement:

7  
8  
9  
10 282 *“A person gets used to what they are doing once they have been oriented. I think sometimes it’s also*  
11 283 *good for you and your team to orient us on how this thing works [...] the way this thing works, we*  
12 284 *don’t know”* (Health centre, Malawi)

13  
14  
15 285 In terms of keeping the devices clean and properly stored, an important factor for prolonging shelf-  
16 286 life, we found conflicting opinions between Malawi and Bangladesh. Malawi deemed the probes  
17 287 easy to clean and store securely, although the light colour and materials of the device was thought  
18 288 to show dirt easily. However, in Bangladesh cleaning was described as burdensome; this likely  
19 289 reflects the different devices and therefore methods needed for cleaning, or different perceptions of  
20 290 the importance and frequency of cleaning.

21  
22  
23  
24  
25 291 *“It is hard work to clean it with hexsol and cotton after coming back from the field every day. If we*  
26 292 *could get something else to clean it with so that we can clean once a week, I don’t like cleaning it*  
27 293 *every day.”* (CHW, Bangladesh)

### 28 294 Design

29  
30  
31  
32  
33 295 The key challenges mentioned repeatedly across sites and HCP cadres were the battery, sensitivity of  
34 296 the probe in relation to movement or low perfusion, and the probe fit in younger children. Table 2  
35 297 summarises the design features requested or suggested to improve the pulse oximeters for use in  
36 298 these low-resource settings. Suggestions covered the probe, such as having detachable probes of  
37 299 different sizes, charging and battery life, such as additional power packs and solar charging, and  
38 300 features to help with agitated children.

39  
40  
41  
42  
43 301 The oximeters which HCPs used were designed for continuous monitoring; therefore oxygen  
44 302 saturation is not a single static result. This was seen as a negative, with HCPs in both sites wanting  
45 303 the ability to stop at a result and even store measurements (e.g. a blood glucose monitor):

46  
47  
48  
49 304 *“Readings would fluctuate if the baby moves. We don’t want that. After getting the actual reading it*  
50 305 *should stay fixed.”* (CHW, Bangladesh)

51  
52  
53 306 In Bangladesh specifically, the CHWs stated a preference for numbers or bars to indicate  
54 307 measurement quality, rather than a dynamic waveform display. This opinion was not reflected in  
55 308 Malawi, which could be a result of using different devices or different training. A specific challenge

1  
2  
3 309 presented by CHWs in Malawi was the use of the oximeter in direct sunlight; CHWs often hold clinics  
4 310 outside and they faced the combined challenges of bright sunlight and dust, both of which they  
5 311 reported as challenges in taking measurements.

6  
7  
8 312 *"...it returns the correct results when you are in the shade, but while you are in sunlight it fails to*  
9 313 *determine good results."* (CHW, Malawi)

10  
11  
12 314 Positive design features included the portability of devices, the ease of using them and perceived  
13 315 durability, with little direct criticism of the oximeters that the HCPs had been using:

14  
15  
16 316 *"...of the things I like most about using the pulse oximeter, the first one is the portability, because I*  
17 317 *can use it anywhere."* (Hospital, Malawi)

18  
19  
20 318

## 21 22 319 **Discussion**

23  
24  
25 320 We investigated end-user experiences of using pulse oximeters by a range of different HCPs across  
26 321 clinical settings in Malawi and Bangladesh. The FGDs highlighted similarities in experience, such as  
27 322 challenges in battery durability, the difficulty of small and agitated children and the positive impact  
28 323 of oximeters on clinical practice. However, there were key differences between the providers'  
29 324 experiences in Malawi and Bangladesh and between HCP cadres.

30  
31  
32  
33 325 Of note was the difference in perceived ease of cleaning, which was seen as more burdensome in  
34 326 Bangladesh. This is likely associated with the Y-shaped wrap probe design, compared to the more  
35 327 easily cleaned clip design used in Malawi (Figure 1). Interestingly though, most critiques were similar  
36 328 between sites, highlighting some of the major challenges of using pulse oximetry in children –  
37 329 namely movement, low perfusion and small digits. This consistency between our sampled HCPs from  
38 330 each site suggests these challenges are not device dependent and therefore a specifically designed  
39 331 re-usable device for universal paediatric use in low-resource settings is needed.

40  
41  
42  
43  
44  
45 332 We identified differences in the sense of value placed on the oximeters by the HCPs, with the higher  
46 333 trained HCPs attributing less value to the results than the HCPs with more limited training. Those  
47 334 with more training valued their clinical judgement more and were more willing to question the  
48 335 accuracy of SpO<sub>2</sub> results. This poses interesting lessons for scaling-up implementation and training,  
49 336 as despite perceptions that obtaining a SpO<sub>2</sub> measurement is generally easy, the interpretation of  
50 337 the result is more nuanced. Sustained mentorship and more in-depth training were desired by the  
51 338 HCPs, and this needs to be considered as part of any implementation programme.



1  
2  
3 339 As the oximeters were used as spot-check devices rather than continuous monitors, as would  
4 340 generally be found in operating theatres or high-dependency care in high-income settings, many of  
5 341 the suggested design changes related to improving the devices for this process. One example of this  
6 342 was the need for improved battery-life and charging, with HCPs highlighting their limited ability to  
7 343 easily access charging points, unlike high-income inpatient settings. Consistently, the desire for  
8 344 quicker, static results and a movement tolerant probe with improved fit on younger infants was  
9 345 important. Unexpected issues, such as usability in direct sunlight, emphasize the importance of end-  
10 346 user engagement in product development as clinical devices designed for high-income settings  
11 347 would not need to be robust to outdoor use.

12  
13  
14  
15  
16  
17  
18 348 The idea of a pulse oximeter being able to improve trust between a caregiver and healthcare  
19 349 provider poses potentially exciting opportunities for improving referral and treatment for paediatric  
20 350 pneumonia. Early diagnosis and treatment as downstream in the health system as possible, ideally to  
21 351 the level of CHWs, are key strategies for improving pneumonia outcomes and therefore reducing  
22 352 morbidity and mortality burden<sup>25</sup>. Therefore, an objective and simple clinical tool with in-built  
23 353 decision support, e.g. auditory or visual alarms when the SpO<sub>2</sub> is outside of normal range, presents  
24 354 an opportunity for caregiver education and empowerment in the referral decision-making process.  
25 355 Recent data from Malawi supports the potential for oximetry to improve referrals, with HCPs from  
26 356 frontline settings more than twice as likely to correctly refer clinically-eligible children with a SpO<sub>2</sub>  
27 357 <90% compared to those with a SpO<sub>2</sub> ≥90% during routine outpatient care<sup>12</sup>. Interestingly, this has  
28 358 not necessarily been the case with other more objective diagnostic tools, with examples of rapid  
29 359 diagnostic malaria tests leading to provider-caregiver tensions around treatments<sup>26 27</sup>.

30  
31  
32  
33  
34  
35  
36  
37  
38 360 This study was potentially subject to social-desirability bias, with healthcare workers expressing  
39 361 opinions which they thought the facilitators wanted to hear. The purpose of the study was explained  
40 362 to the participants during the consent process, and was highlighted as an opportunity for them to  
41 363 contribute to the design of a revised paediatric oximeter and probe. In addition, the groups in some  
42 364 cases were mixed in terms of gender and job titles, possibly influencing participant's confidence in  
43 365 expressing their views and experiences. To mitigate these potential biases, the facilitators  
44 366 encouraged the all participants to contribute to the discussions and to be critical throughout. Both  
45 367 positive and negative views were given in both Malawi and Bangladesh, and by different types of  
46 368 HCPs, therefore we do not feel these biases detract from our findings. Finally, we were limited by  
47 369 the number of groups we conducted; additional groups or a different sampling approach may have  
48 370 led to alternative perspectives being included, as the number was not driven by saturation.

49  
50  
51  
52  
53  
54  
55 371 Therefore the conclusions we draw need to be interpreted accordingly.



1  
2  
3 372 Overall pulse oximeters were valued by the HCPs we sampled for this study, despite challenges with  
4 373 charging, maintenance and speed of achieving accurate readings in moving or smaller children. This  
5  
6 374 implies that making improvements to currently available oximeters and probes could further  
7  
8 375 facilitate successful implementation of this technology at the community through to the hospital  
9  
10 376 level for routine paediatric care in these two settings. Based on these providers varied experiences,  
11  
12 377 we recommend that efforts to re-design a pulse oximeter for paediatric spot-checks focus on  
13  
14 378 improvements to battery durability, better fit for smaller digits and the speed at which readings are  
15  
16 379 obtained; these were all important challenges which did not necessarily have local solutions  
17  
18 380 presented. More substantive design changes could focus on alternative power and charging systems  
19  
20 381 (e.g. solar charging) and '3-in-1' devices which include respiratory rate and temperature  
21  
22 382 measurements.  
23  
24  
25  
26  
27  
28  
29  
30  
31  
32  
33  
34  
35  
36  
37  
38  
39  
40  
41  
42  
43  
44  
45  
46  
47  
48  
49  
50  
51  
52  
53  
54  
55  
56  
57  
58  
59  
60

1  
2  
3 383 **Acknowledgments**  
4

5 384 We would like to thank all those healthcare providers who took part in the focus group discussions  
6  
7 385 for their time. We would like to acknowledge other members of the study team: Katie Fernandez  
8  
9 386 (Lifebox); Charles Makwenda and Tambosi Phiri (Parent and Child Health Initiative); Tim Colbourn  
10  
11 387 (University College London); Mike Bernstein (Physio Monitor); and Nazma Begum, Arun Dutta Roy  
12  
13 388 and Abu Abdullah Mohammad Hanif (Johns Hopkins University-Bangladesh).  
14

15  
16 389

17 390 **Funding**

18 391 This study was funded by the Bill & Melinda Gates Foundation (grant number: OPP1133291).  
19  
20  
21 392

22  
23 393 **Conflict of Interest**

24  
25 394 Authors declare no conflicts of interest.  
26  
27  
28 395

29  
30 396 **Author contributions**

31  
32 397 The qualitative study was designed and topic guides developed by IW<sub>i</sub>, IW<sub>a</sub>, CK and EDM, and the  
33  
34 398 field manual written by CK. Oversight of the study was conducted by CK, BN and BZ in Malawi and  
35  
36 399 EDM, AB and MI in Bangladesh. In Malawi, BZ and EK arranged, conducted, transcribed and  
37  
38 400 translated the FGDs. In Bangladesh SA and MI arranged and conducted the FGDs. The data was  
39  
40 401 coded and analysed by CK. The manuscript was written by CK, with considerable input from EDM.  
41  
42 402 IW<sub>i</sub>, IW<sub>a</sub>, EDM, BZ, EK, SA, MI, NB, AB and BN read, commented and approved the manuscript.  
43

44  
45 403

46 404 **Data Sharing Statement**

47  
48 405 Anonymised transcripts can be shared, following the signing of a data sharing agreement, subject to  
49  
50 406 approval from the relevant National ethics committees. For further information please contact Dr.  
51  
52 407 Carina King: c.king@ucl.ac.uk.  
53  
54  
55  
56  
57  
58  
59  
60

408 **References**

- 409 1. Sazawal S, Black RE, Pneumonia Case Management Trials G. Effect of pneumonia case  
 410 management on mortality in neonates, infants, and preschool children: a meta-analysis of  
 411 community-based trials. *Lancet Infect Dis* 2003;3(9):547-56.
- 412 2. Niessen LW, ten Hove A, Hilderink H, et al. Comparative impact assessment of child pneumonia  
 413 interventions. *Bull World Health Organ* 2009;87(6):472-80.
- 414 3. Walker CL, Rudan I, Liu L, et al. Global burden of childhood pneumonia and diarrhoea. *Lancet*  
 415 2013;381(9875):1405-16. doi: 10.1016/S0140-6736(13)60222-6
- 416 4. Organisation WH. Oxygen therapy for children: a manual for health workers. Geneva: WHO 2016.
- 417 5. . WHO Recommendations on the Management of Diarrhoea and Pneumonia in HIV-Infected  
 418 Infants and Children: Integrated Management of Childhood Illness (IMCI). Geneva2010.
- 419 6. Orimadegun A, Ogunbosi B, Orimadegun B. Hypoxemia predicts death from severe falciparum  
 420 malaria among children under 5 years of age in Nigeria: the need for pulse oximetry in case  
 421 management. *Afr Health Sci* 2014;14(2):397-407. doi: 10.4314/ahs.v14i2.16
- 422 7. Chhibber AV, Hill PC, Jafari J, et al. Child Mortality after Discharge from a Health Facility following  
 423 Suspected Pneumonia, Meningitis or Septicaemia in Rural Gambia: A Cohort Study. *Plos One*  
 424 2015;10(9):e0137095. doi: 10.1371/journal.pone.0137095
- 425 8. Hooli S, Colbourn T, Lufesi N, et al. Predicting Hospitalised Paediatric Pneumonia Mortality Risk:  
 426 An External Validation of RISC and mRISC, and Local Tool Development (RISC-Malawi) from  
 427 Malawi. *Plos One* 2016;11(12):e0168126. doi: 10.1371/journal.pone.0168126
- 428 9. Wandeler G, Pauchard JY, Zangger E, et al. Which clinical signs predict hypoxaemia in young  
 429 Senegalese children with acute lower respiratory tract disease? *Paediatrics and International*  
 430 *Child Health* 2015;35(1):65-68. doi: 10.1179/2046905514Y.0000000153
- 431 10. Basnet S, Adhikari RK, Gurung CK. Hypoxemia in children with pneumonia and its clinical  
 432 predictors. *The Indian Journal of Pediatrics* 2006;73(9):777-81. doi: 10.1007/bf02790384
- 433 11. Lodha R, Bhadauria PS, Kuttikat AV, et al. Can Clinical Symptoms or Signs Accurately Predict  
 434 Hypoxemia in Children with Acute Lower Respiratory Tract Infections? *Indian Pediatr*  
 435 2003;41:129-35.
- 436 12. McCollum ED, King C, Deula R, et al. Pulse oximetry for children with pneumonia treated as  
 437 outpatients in rural Malawi. *Bull World Health Organ* 2016;94:893-902. doi:  
 438 <http://dx.doi.org/10.2471/BLT.16.173401>
- 439 13. Duke T, Subhi R, Peel D, et al. Pulse oximetry: technology to reduce child mortality in developing  
 440 countries. *Ann Trop Paediatr* 2009;29(3):165-75. doi: 10.1179/027249309X12467994190011
- 441 14. Emdin CA, Mir F, Sultana S, et al. Utility and feasibility of integrating pulse oximetry into the  
 442 routine assessment of young infants at primary care clinics in Karachi, Pakistan: a cross-  
 443 sectional study. *BMC Pediatrics* 2015;15(1):141. doi: 10.1186/s12887-015-0463-z
- 444 15. King EM, Lieu C, Kasasa A, et al. Pulse Oximetry as a Screening Tool to Detect Hypoxia Associated  
 445 with Early-onset Sepsis in Asymptomatic Newborns: A Feasibility Study in a Low-income  
 446 Country. *British Journal of Medicine & Medical Research* 2014;4(5):1115-28.
- 447 16. Ginsburg AS, Izadnegahdar R, Klugman KP. World Pneumonia Day 2016: pulse oximetry and  
 448 oxygen. *The Lancet Global Health* 2016;4(12):e893-e94. doi:  
 449 [http://dx.doi.org/10.1016/S2214-109X\(16\)30296-0](http://dx.doi.org/10.1016/S2214-109X(16)30296-0)
- 450 17. Ginsburg AS, Van Cleve WC, Thompson MI, et al. Oxygen and pulse oximetry in childhood  
 451 pneumonia: a survey of healthcare providers in resource-limited settings. *J Trop Pediatr*  
 452 2012;58(5):389-93. doi: 10.1093/tropej/fmr103
- 453 18. Lifebox: Pulse Oximetry [Available from: <http://www.lifebox.org/> accessed 23/11/2017.
- 454 19. The Phone Oximeter [Available from: <http://www.phoneoximeter.org/> accessed 23/11/2017.
- 455 20. Spence H, Baker K, Wharton-Smith A, et al. Childhood pneumonia diagnostics: community health  
 456 workers' and national stakeholders' differing perspectives of new and existing aids. *Glob*  
 457 *Health Action* 2017;10(1):1290340. doi: 10.1080/16549716.2017.1290340

- 1  
2  
3 458 21. Nsona H, Mtimuni A, Daelmans B, et al. Scaling up Integrated Community Case Management of  
4 459 Childhood Illness: Update from Malawi. *Am J Trop Med Hyg* 2012;87(Suppl 5):54-60.  
5 460 22. Malalwi Go. Integrated Management of Childhood Illness - Caring for Newborns and Children in  
6 461 the Community: Manual for Health Surveillance Assistants. In: Health Mo, ed. Lilongwe,  
7 462 Malawi, 2008.  
8 463 23. Gale NK, Heath G, Cameron E, et al. Using the framework method for the analysis of qualitative  
9 464 data in multi-disciplinary health research. *BMC Medical Research Methodology*  
10 465 2013;13(1):117. doi: 10.1186/1471-2288-13-117  
11 466 24. Ritchie J, Spencer L. Qualitative data analysis for applied policy research. *The qualitative*  
12 467 *researcher's companion* 2002;573:305-29.  
13 468 25. McCollum ED, King C, Hammitt LL, et al. Reduction of childhood pneumonia mortality in the  
14 469 Sustainable Development era. *Lancet Respir Med* 2016;4(12):932-33. doi: 10.1016/S2213-  
15 470 2600(16)30371-X  
16 471 26. Ansah EK, Reynolds J, Akanpibiam S, et al. "Even if the test result is negative, they should be  
17 472 able to tell us what is wrong with us": a qualitative study of patient expectations of rapid  
18 473 diagnostic tests for malaria. *Malaria Journal* 2013;12(1):258. doi: 10.1186/1475-2875-12-258  
19 474 27. Hutchinson E, Reyburn H, Hamlyn E, et al. Bringing the state into the clinic? Incorporating the  
20 475 rapid diagnostic test for malaria into routine practice in Tanzanian primary healthcare  
21 476 facilities. *Glob Public Health* 2015:1-15. doi: 10.1080/17441692.2015.1091025  
22 476  
23  
24 477  
25  
26 478

**Table 1:** Summary of the FGD participants and their work experience

|                               | Community level                                              | Health centre or Upazila Health Complex         | Hospital                                                                                                                                             |
|-------------------------------|--------------------------------------------------------------|-------------------------------------------------|------------------------------------------------------------------------------------------------------------------------------------------------------|
| <b>BANGLADESH</b>             |                                                              |                                                 |                                                                                                                                                      |
| Total participants            | 8                                                            | 7                                               | 8                                                                                                                                                    |
| Job titles (number)           | Community healthcare worker (8)                              | Physician (4)<br>Medical officer (3)            | Senior staff nurse (1)<br>Associate professor (2)<br>ICU staff (1)<br>Anaesthesiologist (1)<br>Assistant registrar (1)<br>Intern medical officer (1) |
| Work experience (mean, range) | 1.7 years (0.6 – 4)                                          | 2.3 years (1 – 6)                               | 14.7 years (0.5 – 32)                                                                                                                                |
| <b>MALAWI</b>                 |                                                              |                                                 |                                                                                                                                                      |
| Total participants            | 9                                                            | 8                                               | 9                                                                                                                                                    |
| Job titles                    | Community healthcare worker (8)<br>Vital signs assistant (1) | Medical assistant (7)<br>Medical technician (1) | Clinical officer (3)<br>Nurse midwife (3)<br>Medical assistant (3)                                                                                   |
| Years' work experience (mean) | 10.6 years (5 – 20)                                          | 8.3 years (3 – 23)                              | 8.1 years (4 – 13)                                                                                                                                   |

479

480

481 **Table 2:** Suggestions of desirable features or improvements given by healthcare providers

| Challenge:                   | Design suggestion:                                                                                                                                                                                                                     |
|------------------------------|----------------------------------------------------------------------------------------------------------------------------------------------------------------------------------------------------------------------------------------|
| Probe fit                    | Supplied with multiple sizes of probes for different ages<br>A single cable with multiple probes that can be changed (e.g. clipped into the cable)<br>Softer material for a more comfortable fit                                       |
| Probe placement              | Probe made of transparent material so sensor placement on the nail can be seen                                                                                                                                                         |
| Cleaning                     | Alcohol wipes provided for easier cleaning<br>Different colour probe to make it easier to see the dirt, but does not look dirty quickly                                                                                                |
| Power                        | Solar powered charger with rechargeable batteries<br>Back-up power bank<br>Supplied with a spare battery                                                                                                                               |
| Agitated children            | Toy feature in the device to distract the child<br>Improve the sensitivity of the device to be quicker<br>Improve the sensitivity of the device to tolerate movement                                                                   |
| Integrated spot-check device | Store results in a memory that can later be accessed<br>Static oxygen saturation result display<br>'3-in-1' device which includes temperature and respiratory rate measurements as well<br>Shorter cable length for easier portability |

482

1  
2  
3 483 **Figure legends:**  
4

5 484 **Figure 1:** Pulse oximeters and probe used by healthcare providers in routine clinical care  
6

7 485 a. Lifebox® oximeter and adult universal clip probe used in Malawi (accessed on 1<sup>st</sup> July 2017  
8  
9 486 from: [www.lifebox.org](http://www.lifebox.org))

10 487 b. Masimo Rad5® oximeter and LNCS® Y-I Multisite wrap probe used in Bangladesh (accessed on  
11  
12 488 1<sup>st</sup> July 2017 from: [www.pacificmedicalsupply.com](http://www.pacificmedicalsupply.com))  
13  
14  
15  
16  
17  
18  
19  
20  
21  
22  
23  
24  
25  
26  
27  
28  
29  
30  
31  
32  
33  
34  
35  
36  
37  
38  
39  
40  
41  
42  
43  
44  
45  
46  
47  
48  
49  
50  
51  
52  
53  
54  
55  
56  
57  
58  
59  
60

1  
2  
3  
4  
5  
6  
7  
8  
9  
10  
11  
12  
13  
14  
15  
16  
17  
18  
19  
20  
21  
22  
23  
24  
25  
26  
27  
28  
29  
30  
31  
32  
33  
34  
35  
36  
37  
38  
39  
40  
41  
42  
43  
44  
45  
46  
47  
48  
49  
50  
51  
52  
53  
54  
55  
56  
57  
58  
59  
60

a.



b.



64x97mm (300 x 300 DPI)



## Web Appendix 1 – Topic Guide

- What is your experience of using pulse oximeters in children?
- What have been the main issues you've encountered when using pulse oximeters?
- What have been the things you like most about using the pulse oximeters?
- What type of probes have you used? Have any been better than others? Why?
- Thinking about the probes, we would like to hear your feedback about some aspects of using them: ease of putting and keeping the probe on the child, durability, ease of taking a reading, ease of keeping it clean and storage
- Thinking about the oximeter, we would like to hear your feedback about some aspects of using them: ease of reading the display, durability, battery life and charging, time taken to get a reading
- What things would make the probe and pulse oximeter easier to use?
- What things would make the probe and pulse oximeter harder to use?

**Appendix 2:** Summary of pulse oximeter probes presented during focus group discussions with healthcare providers

| Probe type      | Figure                                                                              | Product code     |
|-----------------|-------------------------------------------------------------------------------------|------------------|
| Neonatal wrap   |    | Acare ASYNR-D1   |
| Adult clip      |    | Acare ASANR-D1   |
| Paediatric clip |   | Acare ASPNR-D1   |
| Ear clip        |  | Nellcor U401-2HL |
| Adult boot      |  | Acare ASSNR-D1   |
| Paediatric boot |  | Nellcor U401-2EL |

## COREQ Checklist

| No                                      | Item                                     | Guide questions/description                                                                                                                      | Page / evidence                    |
|-----------------------------------------|------------------------------------------|--------------------------------------------------------------------------------------------------------------------------------------------------|------------------------------------|
| Domain 1: Research team and reflexivity |                                          |                                                                                                                                                  |                                    |
| Personal Characteristics                |                                          |                                                                                                                                                  |                                    |
| 1.                                      | Interviewer/<br>facilitator              | Which author/s conducted the interview or focus group?                                                                                           | Pg 15, Author contributions        |
| 2.                                      | Credentials                              | What were the researcher's credentials? <i>E.g. PhD, MD</i>                                                                                      | A mix of diploma, BSc, MSc and PhD |
| 3.                                      | Occupation                               | What was their occupation at the time of the study?                                                                                              | Pg 6, Methods: procedure           |
| 4.                                      | Gender                                   | Was the researcher male or female?                                                                                                               | Both                               |
| 5.                                      | Experience and training                  | What experience or training did the researcher have?                                                                                             | Pg 6, 'Methods: Procedure'         |
| Relationship with participants          |                                          |                                                                                                                                                  |                                    |
| 6.                                      | Relationship established                 | Was a relationship established prior to study commencement?                                                                                      | No                                 |
| 7.                                      | Participant knowledge of the interviewer | What did the participants know about the researcher? <i>e.g. personal goals, reasons for doing the research</i>                                  | Pg 15, Discussion                  |
| 8.                                      | Interviewer characteristics              | What characteristics were reported about the interviewer/facilitator? <i>e.g. Bias, assumptions, reasons and interests in the research topic</i> | Pg 15, Discussion                  |
| Domain 2: study design                  |                                          |                                                                                                                                                  |                                    |
| Theoretical framework                   |                                          |                                                                                                                                                  |                                    |

| No                    | Item                                  | Guide questions/description                                                                                                                                     | Page / evidence           |
|-----------------------|---------------------------------------|-----------------------------------------------------------------------------------------------------------------------------------------------------------------|---------------------------|
| 9.                    | Methodological orientation and Theory | What methodological orientation was stated to underpin the study? <i>e.g. grounded theory, discourse analysis, ethnography, phenomenology, content analysis</i> | Pg 7, Methods: Analysis   |
| Participant selection |                                       |                                                                                                                                                                 |                           |
| 10.                   | Sampling                              | How were participants selected? <i>e.g. purposive, convenience, consecutive, snowball</i>                                                                       | Pg 6, Methods: Sampling   |
| 11.                   | Method of approach                    | How were participants approached? <i>e.g. face-to-face, telephone, mail, email</i>                                                                              | Pg 6, Sampling            |
| 12.                   | Sample size                           | How many participants were in the study?                                                                                                                        | Pg 7, Results and Table 1 |
| 13.                   | Non-participation                     | How many people refused to participate or dropped out? Reasons?                                                                                                 | Pg 6, Sampling            |
| Setting               |                                       |                                                                                                                                                                 |                           |
| 14.                   | Setting of data collection            | Where was the data collected? <i>e.g. home, clinic, workplace</i>                                                                                               | Pg 6, Sampling            |
| 15.                   | Presence of non-participants          | Was anyone else present besides the participants and researchers?                                                                                               | Pg 6, Methods: Procedure  |
| 16.                   | Description of sample                 | What are the important characteristics of the sample? <i>e.g. demographic data, date</i>                                                                        | Table 1                   |
| Data collection       |                                       |                                                                                                                                                                 |                           |
| 17.                   | Interview guide                       | Were questions, prompts, guides provided by the authors? Was it pilot tested?                                                                                   | Appendix 1                |
| 18.                   | Repeat interviews                     | Were repeat interviews carried out? If yes, how many?                                                                                                           | Not applicable            |

| No                              | Item                           | Guide questions/description                                              | Page / evidence                                          |
|---------------------------------|--------------------------------|--------------------------------------------------------------------------|----------------------------------------------------------|
| 19.                             | Audio/visual recording         | Did the research use audio or visual recording to collect the data?      | Pg 7, Methods: Procedure                                 |
| 20.                             | Field notes                    | Were field notes made during and/or after the interview or focus group?  | Pg 7, Methods: Procedure                                 |
| 21.                             | Duration                       | What was the duration of the interviews or focus group?                  | Between 1 and 2 hours                                    |
| 22.                             | Data saturation                | Was data saturation discussed?                                           | Pg 14, Discussion                                        |
| 23.                             | Transcripts returned           | Were transcripts returned to participants for comment and/or correction? | This was not possible due to language potential barriers |
| Domain 3: analysis and findings |                                |                                                                          |                                                          |
| Data analysis                   |                                |                                                                          |                                                          |
| 24.                             | Number of data coders          | How many data coders coded the data?                                     | Pg 7, Methods: Analysis                                  |
| 25.                             | Description of the coding tree | Did authors provide a description of the coding tree?                    | Pg 7, Methods: Analysis                                  |
| 26.                             | Derivation of themes           | Were themes identified in advance or derived from the data?              | Pg 7, Results                                            |
| 27.                             | Software                       | What software, if applicable, was used to manage the data?               | Pg 7, Methods: Analysis                                  |
| 28.                             | Participant checking           | Did participants provide feedback on the findings?                       | No, but discussed with local researchers (pg 7)          |

| No        | Item                         | Guide questions/description                                                                                                              | Page / evidence                        |
|-----------|------------------------------|------------------------------------------------------------------------------------------------------------------------------------------|----------------------------------------|
| Reporting |                              |                                                                                                                                          |                                        |
| 29.       | Quotations presented         | Were participant quotations presented to illustrate the themes / findings? Was each quotation identified? e.g. <i>participant number</i> | Throughout results section (pg 7 – 12) |
| 30.       | Data and findings consistent | Was there consistency between the data presented and the findings?                                                                       | Throughout results section (pg 7 – 12) |
| 31.       | Clarity of major themes      | Were major themes clearly presented in the findings?                                                                                     | Pg 7, Results                          |
| 32.       | Clarity of minor themes      | Is there a description of diverse cases or discussion of minor themes?                                                                   | Throughout results section (pg 7 – 12) |
