# Supplementary material for: Opportunities and barriers in paediatric pulse oximetry for pneumonia in low-resource clinical settings: a qualitative evaluation from Malawi and Bangladesh
Source: PubMed Central journal article supplement (PMC5829842; doi:10.1136/bmjopen-2017-019177), 2018-01-30
Supplement: bmjopen-2017-019177supp002.pdf [file bmjopen-2017-019177supp002.pdf]

**Appendix 2:** Summary of pulse oximeter probes presented during focus group discussions with healthcare providers

| Probe type      | Figure                                                                              | Product code     |
|-----------------|-------------------------------------------------------------------------------------|------------------|
| Neonatal wrap   |    | Acare ASYNR-D1   |
| Adult clip      |    | Acare ASANR-D1   |
| Paediatric clip |   | Acare ASPNR-D1   |
| Ear clip        |  | Nellcor U401-2HL |
| Adult boot      |  | Acare ASSNR-D1   |
| Paediatric boot |  | Nellcor U401-2EL |
